1 **Mammalian deubiquitinating enzyme inhibitors display *in vitro* and *in vivo* activity against malaria**  
2 **parasites and potentiate artemisinin action**

3 Nelson V. Simwela<sup>1</sup>, Katie R. Hughes<sup>1</sup>, Michael T. Rennie<sup>1</sup>, Michael P. Barrett<sup>1</sup>, Andrew P. Waters<sup>1\*</sup>

4 <sup>1</sup>Institute of Infection, Immunity & Inflammation, Wellcome Centre for Integrative Parasitology,  
5 University of Glasgow

6

7 \* Corresponding author: Andrew P. Waters, email: [Andy.Waters@glasgow.ac.uk](mailto:Andy.Waters@glasgow.ac.uk)

8

9

10

11

12

13

14

15

16

17

18

19

20

21

22

23

24

25

26

27

28

29

30

31

32

33

34

35 **Abstract**

36 Current malaria control efforts rely significantly on artemisinin combinational therapies which have  
37 played massive roles in alleviating the global burden of the disease. Emergence of resistance to  
38 artemisinins is therefore, not just alarming but requires immediate intervention points such as  
39 development of new antimalarial drugs or improvement of the current drugs through adjuvant or  
40 combination therapies. Artemisinin resistance is primarily conferred by Kelch13 propeller mutations  
41 which are phenotypically characterised by generalised growth quiescence, altered haemoglobin  
42 trafficking and downstream enhanced activity of the parasite stress pathways through the ubiquitin  
43 proteasome system (UPS). Previous work on artemisinin resistance selection in a rodent model of  
44 malaria, which we and others have recently validated using reverse genetics, has also shown that  
45 mutations in deubiquitinating enzymes, DUBs (upstream UPS component) modulates susceptibility  
46 of malaria parasites to both artemisinin and chloroquine. The UPS or upstream protein trafficking  
47 pathways have, therefore, been proposed to be not just potential drug targets, but also possible  
48 intervention points to overcome artemisinin resistance. Here we report the activity of small  
49 molecule inhibitors targeting mammalian DUBs in malaria parasites. We show that generic DUB  
50 inhibitors can block intraerythrocytic development of malaria parasites *in vitro* and possess  
51 antiparasitic activity *in vivo* and can be used in combination with additive effect. We also show that  
52 inhibition of these upstream components of the UPS can potentiate the activity of artemisinin *in*  
53 *vitro* as well as *in vivo* to the extent that ART resistance can be overcome. Combinations of DUB  
54 inhibitors anticipated to target different DUB activities and downstream 20s proteasome inhibitors  
55 are even more effective at improving the potency of artemisinins than either inhibitors alone  
56 providing proof that targeting multiple UPS activities simultaneously could be an attractive approach  
57 to overcoming artemisinin resistance. These data further validate the parasite UPS as a target to  
58 both enhance artemisinin action and potentially overcome resistance. Lastly, we confirm that DUB  
59 inhibitors can be developed into *in vivo* antimalarial drugs with promise for activity against all of  
60 human malaria and could thus further exploit their current pursuit as anticancer agents in rapid drug  
61 repurposing programs.

62  
63  
64  
65  
66  
67  
68

69 **Graphical abstract**

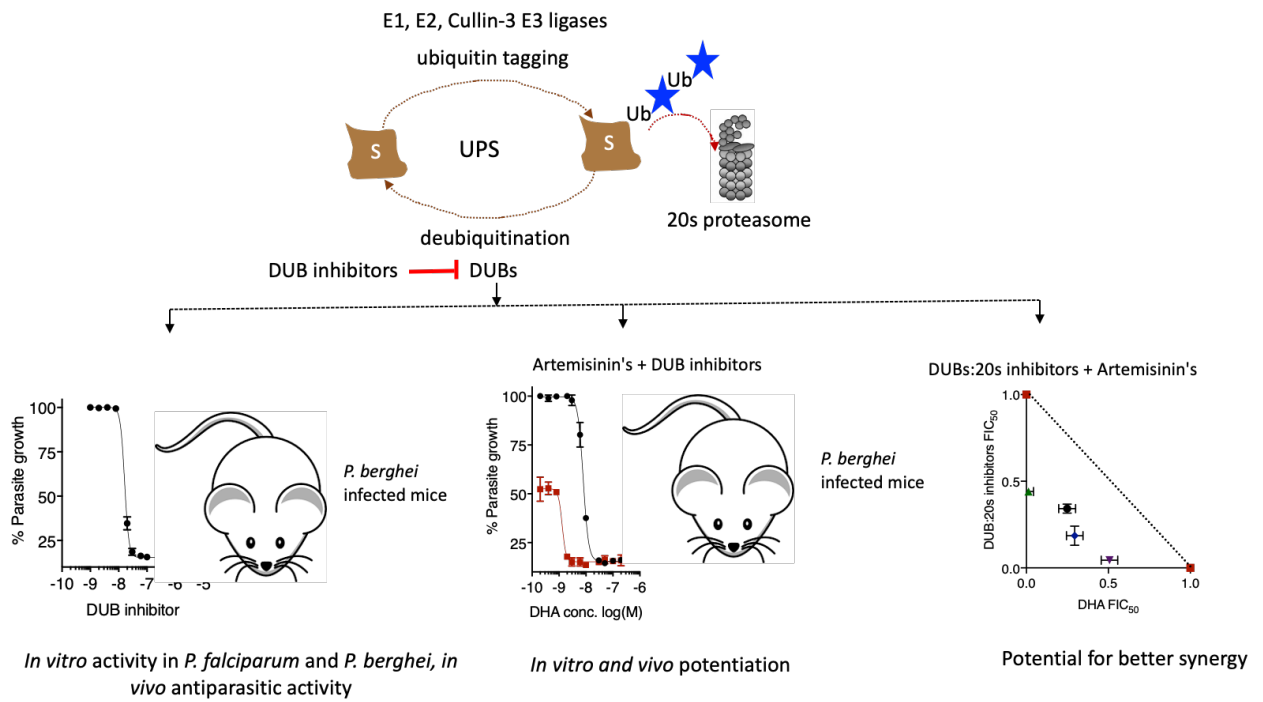

70  
71  
72  
73  
74  
75  
76  
77  
78  
79  
80  
81  
82  
83  
84  
85  
86  
87  
88  
89

## 90 Introduction

91 Malaria remains the most important parasitic disease in tropical and sub-tropical regions of the  
92 world with high rates of morbidity and mortality. Despite significant gains in malaria control over  
93 the past decade, over 220 million cases and 400 000 deaths were reported in 2018, with >90% of  
94 these occurring in the WHO African region.<sup>1</sup> More worryingly, a global stall in malaria control has  
95 been reported with a steady increase in malaria cases being observed between 2015 and 2018.<sup>1-2</sup>  
96 Caused by apicomplexan parasites of the genus *Plasmodium*, the most lethal form of human malaria  
97 is caused by *Plasmodium falciparum* which accounts for >99% of malaria cases and deaths in Sub-  
98 Saharan Africa.<sup>1</sup> However, human malaria caused by other *Plasmodium* spp. such as *P. vivax*, *P.*  
99 *ovale*, *P. malaria* and the zoonotic *P. knowlesi* remains a significant public health problem causing  
100 significant morbidity and economic impact in already poverty stricken communities.<sup>1</sup> The life cycle  
101 of malaria parasites comprises of multiple developmental stages between mosquito and mammalian  
102 hosts. Antimalarial drugs, which form principle components of malaria control programs, target the  
103 parasite at different life cycle stages, mostly the proliferating trophozoites and schizont stages  
104 during the intraerythrocytic development cycle of the parasites which are associated with most of  
105 the disease pathology. Artemisinins (ARTs) in ART combination therapies are the current front line  
106 drugs in malaria treatment.<sup>1</sup> They display fast and potent activity against virtually all blood stages of  
107 the parasites, as well as gametocytes that mediate transmission to mosquito vectors.<sup>3-4</sup> Indeed, such  
108 is the effectiveness of ARTs, that recent gains in malaria control have been partly attributed to ART  
109 combination therapies.<sup>2,4</sup> Unfortunately, *P. falciparum* (PF) resistance to ARTs has emerged in the  
110 Southeast Asia greater Mekong region and is characterised by point mutations in the Kelch13  
111 propeller domain that associate with decreased parasite clearance rates in clinical phenotypes.<sup>1,4-5</sup>  
112  
113 ARTs are sesquiterpene lactones derived from the Chinese herb *Artemisia annua*. Central to the  
114 activity of ARTs is the activation of the core endoperoxide bridge by haem which triggers the  
115 production of carbon centred radicals which in turn alkylate multiple and random downstream  
116 parasite targets.<sup>6-7</sup> The actual events leading to ART mediated parasite death remain elusive as well  
117 as disputed. However, a promiscuous targeting of several parasite proteins by the ART generated  
118 radicals is widely accepted.<sup>8-9</sup> The ART resistance- associated mutations lie in the beta propeller  
119 domain of the Kelch13 protein in PF.<sup>10</sup> Recent work on the biological function and consequences of  
120 these Kelch13 mutations has revealed that Kelch13 localises to the parasite cytoplasmic periphery in  
121 cellular compartments called cytosomes and plays a role in haemoglobin endocytosis. ART  
122 resistance-associated mutations in Kelch13 lead to reduced abundance of this protein leading to  
123 impaired haemoglobin trafficking which lessens ART activation hence promoting parasite survival.<sup>11-</sup>

124 <sup>12</sup> In addition, ART induced pleiotropic targeting is also known to activate ER stress and the unfolded  
125 protein response (UPR) which allow parasites to survive drug assault by rapidly turning over  
126 damaged proteins while employing cell repair mechanisms. <sup>6-7,13</sup> ART resistant parasites (Kelch13  
127 mutants) are indeed associated with an upregulation of genes involved in these cellular stress  
128 response pathways. <sup>14</sup> Meanwhile, parallel functional and localisation studies have also revealed that  
129 Kelch13 co-localises with multiple UPR components, proteins specific to the ER and mitochondria as  
130 well as intracellular vesicular trafficking Rab GTPases. <sup>15-16</sup> Central to the activity of the UPR is the  
131 ubiquitin proteasome system (UPS), a conserved eukaryotic pathway that plays a role in protein  
132 homeostasis by degrading unfolded proteins. Under ART pressure, activity of the UPS is more  
133 upregulated in Kelch13 mutant parasites compared to wild type while UPS inhibitors have been  
134 shown to synergize ART action suggesting that this pathway could be selectively targeted to  
135 overcome ART resistance. <sup>17-18</sup> Of note, Kelch13 is also predicted to play additional roles as substrate  
136 adaptor for ubiquitin E3 ligases, crucial components of the UPS; <sup>7,10</sup> while mutations in upstream  
137 components of the UPS (ubiquitin hydrolases or deubiquitinating enzymes) also modulate  
138 susceptibility to ARTs. <sup>19-21</sup> Chemotherapeutic targeting of the UPS has been successfully pursued in  
139 cancers <sup>22</sup> and is increasingly becoming attractive in malaria parasites, <sup>23</sup> even more so as potential  
140 combinatorial partners to ARTs to overcome resistance. <sup>17-18</sup>

141  
142 Here we report the activity of deubiquitinating enzyme (DUBs) inhibitors in both rodent and human  
143 malaria parasites. DUBs are proteases that cleave ubiquitin residues from conjugated substrate  
144 proteins in the UPS pathway. UPS targeting of proteins is initiated by ubiquitin (Ub) tagging of  
145 substrates which marks them either for specific cellular signal transduction processes like DNA repair  
146 and cell cycle progression or subsequent degradation by the 20s proteasome. <sup>24</sup> Ub tagging is  
147 mediated by three sequential enzymes: E1, an activating enzyme; E2, a conjugating enzyme and E3,  
148 a Ub ligase for substrate specificity. The activity of these enzymes results in polyubiquitination of  
149 substrate proteins which signals for their degradation at the 20s proteasome complex depending on  
150 the number of Ub residues. DUBs reverse the activity of these downstream UPS enzymes by  
151 removing Ub from the conjugated substrates which results in diverse protein fates and cellular  
152 outcomes among which include; regulation of protein half-life, cell growth, differentiation,  
153 transcription; rescue of mis-tagged proteins as well as oncogenic and neuronal disease signalling. <sup>25</sup>  
154 Over 100 DUBs have been identified in humans and they classify into five major families: Ub C-  
155 terminal hydrolases (UCHs), Ub specific proteases (USPs), ovarian tumour proteases (OTUs),  
156 Josephins and JAMM/MPN/MOV34. <sup>25</sup> In malaria parasites, up to 30 DUBs have been predicted  
157 across five *Plasmodium* species (PF, *P. vivax*, *P. berghei* (PB), *P. chabaudi*, *P. yoelii*); even though their

158 functions remain to be fully explored.<sup>26-27</sup> Nevertheless, *Plasmodium* DUBs seem to have intrinsic  
159 protease activity, are significantly divergent and their human orthologues are known to be  
160 important regulators of cellular pathway which makes them suitable and potential drug targets.<sup>28</sup>  
161 The role of DUBs in mediating susceptibility to standard drugs like ARTs, the diversity in the classes  
162 of DUBs and the predicted repertoire in malaria parasites would also mean an expanded chemical  
163 space for drug discovery, potential inhibitor combination for different classes as well as using DUB  
164 inhibitor combinations to overcome ART resistance. Herein, using generic mammalian DUB inhibitors  
165 that have been used as exploratory research tools as well as in clinical trials, we show that DUB  
166 inhibitors do possess *in vitro* and *in vivo* inhibitory activities against malaria parasites across two  
167 diverged *Plasmodium* species. We demonstrate that different classes of DUB inhibitors can be  
168 combined to provide greater killing efficacy as well as enhance the potency of ARTs both *in vitro* and  
169 *in vivo*. Our data demonstrate that DUB inhibition can be exploited to overcome ART resistance with  
170 similar potency as first generation proteasome inhibitors. Furthermore, inhibition of both the UPS  
171 and DUBs can be combined to further improve the potency of ARTs and negate ART resistance.  
172 These findings have the potential to be applied to the treatment of all human malaria.

173

174

## 175 **Results**

### 176 ***In vitro* activity of DUB inhibitors in malaria parasites**

177 To assay for *in vitro* activity of DUB inhibitors in malaria parasites, short term PB culture assays and  
178 PF Sybergreen I<sup>®</sup> culture assays were employed. The PB 820 and PF 3D7 lines were initially screened  
179 to determine susceptibility to inhibitors and antimalarials with known activity in malaria parasites;  
180 ART, dihydroartemisinin (DHA), chloroquine (CQ) and epoxomicin (20s proteasome inhibitor). The  
181 half-inhibitory concentrations (IC<sub>50</sub>) obtained for epoxomicin, DHA, ART and CQ in both the 820 and  
182 3D7 lines (Table 1) were all in agreement with previously published IC<sub>50</sub> values in both *Plasmodium*  
183 species.<sup>29-32</sup> Next, we screened seven DUB inhibitors (Table 1) in both the 820 and 3D7 line to  
184 characterise their inhibitory activity during the intraerythrocytic stages of malaria parasites. The  
185 selected compounds are DUB inhibitors being currently pursued as promising anticancer agents  
186 (Table 1) that also offered a broad coverage targeting of the 5 classes of DUBs. As shown in Table 1,  
187 activity was observed for six of the seven DUBs tested in the 820 and 3D7 lines. The activity of USP  
188 acting DUB inhibitors; b-AP15, P5091 and NSC632839 corresponds with the reported *in vitro* IC<sub>50</sub>s of  
189 the compounds screened in cancer cell lines<sup>33-35</sup>. b-AP15 IC<sub>50</sub> also compared to previously reported  
190 IC<sub>50</sub>s of 1.54 ± 0.7 μM and 1.10 ± 0.4 μM in PF CQ sensitive (3D7) and resistant (Dd2) lines  
191 respectively.<sup>36</sup> Growth inhibition was also observed for broad spectrum DUB inhibitors; PR-619 and

192 1,10 phenanthroline, as well as a partially selective DUB inhibitor, WP1130 (Table 1). These data  
193 suggest that DUBs are potentially essential enzymes in *Plasmodium*, and they could be pursued as  
194 potential antimalarial drug targets. Indeed, a manual curation of up to 17 of the predicted DUBs in  
195 malaria parasites<sup>26-27</sup> shows that a majority of these (~70%, 12 of 17) are essential in either PF and  
196 PB or both (Supplementary Table 1) based on previous functional studies for selected DUBs<sup>37-38</sup> or  
197 recent genome wide gene knockout screens.<sup>39-40</sup> Strikingly, no growth inhibition was observed for  
198 TCID (IC<sub>50</sub> >100 µM), a UCH-L3 inhibitor, in both the 820 and 3D7 lines (Table 1, Supplementary  
199 Figure 1A, 1B). Among the well characterised DUBs in malaria parasites is PF UCH-L3 (PfUCH-L3,  
200 PF3D7\_1460400) which was identified by activity based chemical profiling and has been shown to  
201 retain core deubiquitinating activity.<sup>41</sup> Structural and functional characterisation of PfUCH-L3 has  
202 also shown that this enzyme is essential for parasite survival (Supplementary Table 1).<sup>38</sup> Meanwhile,  
203 in our screen, TCID, a highly selective mammalian UCH-L3 inhibitor with an IC<sub>50</sub> of 0.6 µM in  
204 mammalian cancer cell lines,<sup>42</sup> displayed no activity in both the 820 and 3D7 lines (Table 1,  
205 Supplementary Figure 1A, 1B). To possibly address this (unexpected) lack of activity, we performed a  
206 phylogenetic analysis of *Plasmodium*, human and mouse UCH-L3 based on predicted protein  
207 sequences to infer their similarities which might explain the observed lack of anti-plasmodial activity  
208 of TCID. A distinct evolutionary divergence of this enzyme was observed between human, mouse  
209 and the most similar *Plasmodium* homologues (PBANKA\_1324100/PF3D7\_1460400) which whilst  
210 annotated as UCH-L3 shares only 33% predicted protein sequence identity with the human UCH-L3  
211 (Supplementary Figure 1C, D). Structurally, human UCH-L3 and PfUCH-L3 have similar modes of Ub  
212 recognition and binding. However, the PfUCH-L3 Ub binding groove is structurally different from the  
213 human UCH-L3 at atomic bonding level and possesses non-conserved amino acid residues.<sup>38</sup> This  
214 lack of complete identity across active sites would perhaps further explain the observed inactivity of  
215 TCID in both PF and PB.

216  
217

### 218 **Different classes of DUB inhibitors can be combined to provide more effective blocking of malaria** 219 **parasite growth *in vitro*.**

220 To explore interactions between DUB inhibitors, and their potential synergy, b-AP15, a highly  
221 selective USP14 inhibitor<sup>34</sup> and the relatively most potent inhibitor of parasite growth in both PF  
222 and PB, was tested in fixed ratios with broad-spectrum DUB inhibitors; PR-619 and WP1130.  
223 Combinations at fixed ratios of 5:0, 4:1, 3:2, 1:4 and 0:5 were serially diluted and incubated with  
224 parasite cultures of the 3D7 line from which parasite growth and IC<sub>50</sub>s were obtained. FIC<sub>50</sub>s and  
225 ΣFIC<sub>50</sub>s were calculated and isobologram interactions were plotted. A combination of b-AP15 and

226 PR-619 is mostly additive with a mean  $\Sigma\text{FIC}_{50}$  of  $0.753\pm 0.23$ , (Figure 2A). Meanwhile, b-AP15 and  
227 WP1130 seemingly trends towards synergy with a mean  $\Sigma\text{FIC}_{50}$  of  $0.653\pm 0.23$ , (Figure 2B) even  
228 though the interaction remains overall additive. These data suggested that DUB inhibitors, as  
229 potential antimalarial drug candidates, can be used in combination to block parasite growth  
230 presumably by simultaneously targeting several different DUB enzymatic targets.

231

### 232 **DUB inhibitors alone or in combination can potentiate DHA action in malaria parasites *in vitro***

233 In order to test the hypothesis that DUB inhibitors might have a similar effect of potentiating ART  
234 activity as 20s proteasome inhibitors, we investigated the effects of DUB inhibitors on the dose  
235 response profiles of DHA *in vitro* on wild type PB and PF growth as well as their potential to  
236 synergize DHA action in fixed ratio interaction assays. The most potent DUB inhibitor b-AP15 at  
237 equivalent  $\text{IC}_{50}$  concentration improved DHA action with up to ~8-fold  $\text{IC}_{50}$  shift in wild type PB  
238 growth inhibition (Figure 2A) and up to 15-fold enhancement in the wild type PF growth inhibition  
239 (Figure 2B). The differences in potentiation between PB and PF could be due to the inherent reduced  
240 susceptibility of PB to ARTs.<sup>20, 43</sup> The enhancement of DHA action by b-AP15 was also almost similar  
241 to previously reported profiles with epoxomicin, a 20s proteasome inhibitor.<sup>17</sup> We have recently  
242 shown that experimental introduction of mutations in a DUB, UBP-1, mediated reduced  
243 susceptibility to ARTs in PB.<sup>20</sup> UBP-1 has a close human orthologue HAUSP/USP7 which is itself  
244 inhibited by P5091, a drug which in our *Plasmodium* screen was poorly potent with a relatively high  
245 micromolar  $\text{IC}_{50}$  (Table 1). Nevertheless, b-AP15 (a USP-14 inhibitor) potentiated DHA action to the  
246 same extent as in wild type ART-sensitive PB (9-11-fold) in two UBP1 mutant lines that have reduced  
247 susceptibility to ART (V2721F) or both ART and CQ (V2752F) (Supplementary Figure 2A & B).  
248 Therefore, ART (and potentially CQ) reduced susceptibility could be offset by a combinatorial drug  
249 administration approach involving DUB inhibitors through a targeted disruption of protein  
250 homeostasis most likely at the level of the UPS.

251

252 In an attempt to maximise DUB inhibitor combinations, which offered improved inhibition of  
253 parasite growth (Figure 1) as a strategy for simultaneously targeting several DUBs in the presence of  
254 DHA, we tested the effect of combining b-AP15, PR-619 and WP1130 on the dose response profile of  
255 DHA. WP1130 and PR-619 at  $\text{IC}_{50}$  concentration mildly potentiate DHA action with 1.8- and 1.4-fold  
256 improvements respectively (Supplementary Figure 3A, 3B). Meanwhile, a combination of b-AP15  
257 and WP1130 at half  $\text{IC}_{50}$  mildly potentiated DHA action (~2-fold, Figure 2C), while all three inhibitors  
258 (b-AP15, WP1130 and PR-619) at half  $\text{IC}_{50}$  improved DHA action up to 5-fold in the ART sensitive PF  
259 (Figure 2D) and PB (Figure 2E) as well as the ART resistant PF Kelch13 C580Y mutant lines (Figure 2F).



260 We carried out further isobologram interaction assays for DUB inhibitor ratio combinations in an  
261 attempt to achieve improved *in vitro* killing (Figure 1) in combination with DHA. Both b-AP15 and  
262 WP1130 were essentially additive when combined with DHA in isobologram interactions with  $\Sigma\text{FIC}_{50s}$   
263 of 0.967 and 1.013 respectively (Supplementary Figure 3C, 3D). However, when b-AP15 and WP1130  
264 were mixed at a 3:2 molar concentration ratio as a cocktail and combined with DHA, a slight  
265 improvement in efficacy was observed with an  $\Sigma\text{FIC}_{50}$  of  $\sim 0.868$  (Figure 2G) compared with 0.972 at  
266 1:4 b-AP15 WP1130 molar concentration ratios (Figure 2H) or 0.941 at 2:3 b-AP15 WP1130 molar  
267 concentration ratio (Figure 2I). These data would suggest that optimized ratios of (improved) DUB  
268 inhibitor combinations or other proteasome inhibitors might yet achieve synergy with DHA, which  
269 would be a prerequisite to simultaneously targeting multiple DUBs or parallel pathways/enzymes in  
270 the UPS in future antimalarial combination therapies.

271

### 272 **A combination of DUB and 20s proteasome inhibitor can synergize with DHA**

273 An alternative approach to alleviating antimalarial resistance is combination therapies that target  
274 multiple points within known resistance mediating pathways and/or novel antimalarial drug  
275 pathways to prevent the emergence of or overcome resistance. Therefore, we explored a  
276 combination of an upstream DUB inhibitor (b-AP15) and a 20s proteasome inhibitor (epoxomicin)  
277 with DHA in fixed ratio isobologram interactions. Firstly, we tested epoxomicin in combination with  
278 DHA as well as b-AP15 and epoxomicin in fixed ratios against PF. Epoxomicin improved DHA action  
279 mildly with an  $\Sigma\text{FIC}_{50}$  of 0.881 (Figure 3A) which corresponds with previously reported profiles.<sup>17</sup>  
280 Interestingly, b-AP15 and epoxomicin as a combination alone was not an improved regimen with an  
281  $\Sigma\text{FIC}_{50}$  of 1.162 (Figure 3B). This failure may result from a suppression mechanism where targeting  
282 the USP14 DUB upstream by b-AP15 (Figure 3D) would potentially counteract the activity of  
283 downstream 20s proteasome inhibitor and vice versa.<sup>44</sup> However, a 1:1 molar ratio of b-AP15 and  
284 epoxomicin when combined with DHA, an improved interaction with DHA ( $\Sigma\text{FIC}_{50}$  of 0.614) was  
285 achieved (Figure 3C) than by either of the drugs alone (Figure 3A, Supplementary Figure 3C). This  
286 illustrates that targeting the UPS at several points with the optimized inhibitor concentrations can  
287 significantly improve DHA efficacy.

288

289

### 290 **Pre-incubation of malaria parasites with UPS inhibitors efficiently mediates DHA potentiation**

291 A further way to combat drug resistance in malaria, which is being explored with antibiotics<sup>45</sup> and  
292 has been the case with cancer neo-adjuvant therapies, would be to pre-expose parasites to lethal or  
293 sub-lethal doses of inhibitors that target the resistance pathways before the main treatment course.

294 A targeted inhibition of the resistance conferring pathways might then in turn improve the activity of  
295 any downstream main treatment drug. Therefore, we investigated the effect of pre-exposing malaria  
296 parasites to DUB or 20s proteasome inhibitors on the short time exposure dose response profiles to  
297 DHA in both PB and PF. The PB 507 line, which expresses a green fluorescent protein (GFP)  
298 constitutively, was used to monitor GFP intensity across the life cycle after exposure to serial  
299 concentrations of DHA for 3 hours, administration of which followed prior exposure of the parasites  
300 (1.5 hour old rings) for 3 hours to IC<sub>50</sub> concentrations of b-AP15. Quantification of the GFP  
301 fluorescent signal expressed from a constitutive promoter in PB would allow us to investigate the  
302 global dynamics of protein homeostasis, recycling, unfolding and or damage which occurs in the  
303 parasites upon exposure to DHA and or UPS inhibitors. Monitoring of GFP intensity at 6, 18 and 24  
304 hours revealed that b-AP15 pre-exposure enhances the potency of DHA as indicated by significant  
305 abrogation of GFP intensity at all the time points (Figure 4A). Additional administration of b-AP15  
306 after DHA incubation further abrogates GFP intensity illustrating that b-AP15 compromises UPS  
307 activity in tandem with DHA, which would make them suitable partner drugs. In the PF 3D7 line, pre-  
308 incubation of ~0-3 hour old rings with b-AP15 at IC<sub>50</sub> or half IC<sub>50</sub> for 3 hours followed by DHA  
309 treatment for 4 hours markedly impacts parasite viability (5 and 1.6 fold respectively) compared to  
310 DMSO exposed parasites, while pre-exposing the parasites to b-AP15 at 4x IC<sub>50</sub> is almost entirely  
311 lethal to the parasites (Figure 4B). Meanwhile, pre-exposure of 3D7 or an ART resistant Kelch13  
312 C580Y line to epoxomicin at IC<sub>50</sub> or 0.2x IC<sub>50</sub> followed by DHA also significantly impacted parasite  
313 viability (~4.6 and ~1.4 fold respectively) as compared to DMSO (Figure 4C, 4D). Remarkably, in both  
314 the 3D7 and ART resistant Kelch13 C580Y lines, a combination of b-AP15 and epoxomicin at half IC<sub>50</sub>  
315 achieved better potency with DHA ( 18 and 33-fold respectively) compared to either of the drugs  
316 alone at IC<sub>50</sub> (Figure 4B, 4C, 4D) further illustrating that targeting multiple UPS components (Figure  
317 3C) could be a flexible approach to overcoming ART resistance.

318  
319

### 320 **b-AP15 fails to block parasite growth but potentiates ART action *in vivo***

321 We next investigated the ability of b-AP15 to block parasite growth *in vivo* and potentially enhance  
322 ART action. An analogue of b-AP15 (itself a lead first generation DUB inhibitor), VLX1570 entered  
323 clinical trials for the treatment of multiple myeloma (Wang et al., 2016), despite being later  
324 terminated due to dose ascending toxicities (NCT02372240). b-AP15 has strong antiproliferative  
325 effects in human cancer cell lines and has displayed significant antitumor activity at 5mg/kg in *in vivo*  
326 mouse models without any side effects.<sup>34</sup> However, in a Peters' 4 day suppressive test, b-AP15 fails  
327 to clear PB parasites *in vivo* at both 1mg/kg and 5mg/kg with only minor reductions in parasite

328 burdens on day 4 and 5 post treatment at the latter dose which corresponds to ~70% parasite  
329 suppression on day 4 (Figure 5A, 5B, 5C). Contrary to the previous reported safety profiles of b-AP15,  
330 <sup>34</sup> mice (Theiler's Original) treated with 5mg/kg b-AP15 started to develop toxicity signs as  
331 demonstrated by significant weight loss on day 4 and 5 post-treatment. Further treatments at  
332 5mg/kg or higher doses were thus not pursued. To investigate the ability of b-AP15 to potentiate  
333 ART action *in vivo*, b-AP15 was administered at 1mg/kg (a safe dose that did not have any effect on  
334 parasite growth alone, Figure 5A) in combination with ART at 5mg/kg and 10mg/kg in established  
335 mice infections at a parasitaemia of 2-2.5% for three consecutive days. A combination of ART  
336 (5mg/kg) and b-AP15 (1mg/kg) did not have any significant parasite reduction as compared to ART  
337 (5mg/kg) alone, while ART at 20mg/kg cleared the parasites after three consecutive doses as  
338 expected (Figure 5D). However, a combination of ART (10mg/kg) and b-AP15 (1mg/kg) significantly  
339 abrogated parasite burden as compared to ART (10mg/kg) alone to the same extent as ART at  
340 20mg/kg (Figure 5E). These data further showed that b-AP15 can enhance ART action *in vivo*, to a  
341 similar extent as observed *in vitro*.

342  
343

#### 344 **Discussion**

345 With the increasing incidence of resistance to (even combinations of) antimalarial drugs by PF and  
346 the lack of rapidly amenable drug discovery programs for related *Plasmodium* spp. such as *P. vivax*,  
347 pipelines to develop new antimalarial drugs to treat the disease as well as improve the activity of  
348 current antimalarials and tackle resistance are urgently needed. Here, we report *in vitro* and *in vivo*  
349 activity of a class of compounds targeting the parasite upstream UPS component (DUBs) in PF and  
350 PB. Antimalarial drugs are typically discovered for their activity against PF *in vitro*. Lead compounds  
351 from PF *in vitro* screens are evaluated for *in vivo* efficacy using rodent malaria parasites which have  
352 been for a long time, crucial components of these drug discovery programs. <sup>46</sup> PB is the most  
353 commonly used rodent model (in what is called the Peters' four-day suppressive test) and the  
354 development of methods that allow assessment of both *in vitro* drug sensitivity and *in vivo* efficacy  
355 in this model, <sup>47</sup> as we demonstrate in this study, permits easy comparisons with PF *in vitro* efficacy  
356 data. Moreover, this provides crucial *in vitro* bridging information on whether potential drug efficacy  
357 discrepancies between PF *in vitro* and PB *in vivo* are due to pharmacokinetics of the drug or intrinsic  
358 differences in drug sensitivity between the *Plasmodium* spp. As a species of *Plasmodium* that is well  
359 diverged from both PF and other human-infectious *Plasmodium*, PB drug efficacy assessment also  
360 offers a useful comparative for other non-PF human causing *Plasmodium* spp. as chemical entities

361 that display PF inhibitory activity *in vitro* and PB inhibitory activity *in vitro* and *in vivo* are also likely  
362 to be active against other (human infectious) *Plasmodium* species.  
363  
364 Herein, activity is reported for six DUB inhibitors covering most of the DUB enzyme families and  
365 include b-AP15, P5091 and NSC632839 which specifically target USPs that all displayed antimalarial  
366 activity against both rodent and human malaria parasites *in vitro*. USPs are the largest family of  
367 DUBs comprising of up to 56 individual enzymes in humans.<sup>48</sup> However, since less is known of USPs  
368 in malaria parasites, with their current assignments largely based on *in silico* predictions,<sup>26-27</sup> the  
369 precise targets of these drugs remain largely obscure. Human USP14 has been demonstrated to be  
370 the target of b-AP15<sup>34</sup> and its PF orthologue PfUSP14 (PF3D7\_0527200) has been recently  
371 characterised and shown to bind the parasite 20s proteasome.<sup>36</sup> Moreover, purified PfUSP14  
372 cleaves di-ubiquitin bonds in intact polyubiquitin chains illustrating functional identity of this  
373 *Plasmodium* DUB with its human counterpart.<sup>36</sup> This provides evidence that PfUSP14 may be  
374 specifically essential in parasite proliferation during the asexual blood cycle which was supported by  
375 a whole genome piggyBac saturation mutagenesis screen in which PfUSP14 was shown to be  
376 refractory to deletion (Supplementary Table 1).<sup>39</sup> Our data also support this in both PF and PB  
377 despite the PB counterpart (PBANKA\_1242000) appearing to be dispensable in a recombinase  
378 mediated genetic screen.<sup>40</sup> The differences in essentiality could be due to functional differences  
379 between the two *Plasmodium* spp. USP14s. as they seem to share only ~62% sequence identity  
380 (Supplementary Figure 4). The activity of b-AP15 in both PF and PB however, at almost equivalent  
381 potencies, could thus be suggestive of possible suitable compensatory effects from other DUBs upon  
382 deletion in PB which is not sufficiently compensated for when an inhibitor is used. b-AP15 may also  
383 target other DUB (or possess off target) activities in *Plasmodium* as the inhibition of purified  
384 PfUSP14 by b-AP15 is less potent than its overall parasite killing potency.<sup>36</sup> Nevertheless, the  
385 observed structural difference between human USP14 and PfUSP14 at the core catalytic domain, its  
386 possible essentiality and the activity of b-AP15 in both PF and PB *in vitro* suggests that PfUSP14 can  
387 be selectively targeted throughout the *Plasmodium* genus.<sup>36</sup> Furthermore, the observed activity of  
388 other USP inhibitors, P5091 and NSC632839 in this study suggests that their targets are essential  
389 (Supplementary Table 1) during the asexual proliferation stages of malaria parasites and can serve as  
390 useful chemical leads for more potent antimalarial discovery. More importantly, b-AP15 possesses  
391 antiparasitic activity *in vivo* achieving up to 70% parasite suppression of PB at the highest  
392 concentrations that have been tested in cancer models.<sup>34</sup> Malaria parasites have been shown to  
393 rapidly replenish proteasomes in the presence of sub-lethal doses of proteasome inhibitors<sup>49</sup> which  
394 would possibly explain the observed inability of b-AP15 to completely block parasite growth at this

395 concentration as compared to control antimalarial drugs. Whilst promising, we noted issues with the  
396 reported safety profiles of b-AP15 at 5mg/kg<sup>34</sup> where mice significantly lost weight after 4  
397 consecutive doses. This effect could be due to the combination of a chemical inhibitor and parasite  
398 challenge making the mice more susceptible to toxic effects of b-AP15, a phenomenon which has  
399 been previously reported with carfilzomib, a 20s proteasome inhibitor.<sup>49</sup> Meanwhile, the *in vitro*  
400 activity of broad-spectrum DUB inhibitors, PR-619 and WP1130 as well as a zinc chelating  
401 metalloprotease inhibitor (1, 10 phenanthroline) further alludes to the promise of DUBs as drug  
402 targets in malaria parasites.

403  
404 A further striking finding was the inactivity of TCID (a UCH-L3 inhibitor) in both rodent and human  
405 malaria parasites. PfUCH-L3 has been well characterised in malaria parasites and has been shown to  
406 retain core deubiquitinating activity.<sup>41</sup> Moreover, disruption of PfUCH-L3 by experimentally  
407 replacing the native enzyme with a catalytically dead form was shown to be lethal to the parasite.<sup>38</sup>  
408 The inactivity of TCID in both rodent and human malaria parasites reported here is therefore  
409 suggestive of striking differences between mammalian and *Plasmodium* UCH-L3s. Our sequence  
410 analysis demonstrated that PfUCH-L3 shares ~33% sequence identity with human UCH-L3 consistent  
411 with previous structural and molecular docking comparisons of PfUCH-L3 and human UCH-L3 which  
412 also revealed significant differences between the enzymes especially at the ubiquitin binding groove.  
413<sup>38</sup> This makes PfUCH-L3 an even more attractive drug target for ultra-selectivity as it is also known to  
414 possess denedylating activities which are absent in mammalian UCH-L3s.<sup>41</sup>

415  
416 Targeting the *Plasmodium* UPS is an emerging interventional point, not just as a potential drug  
417 target, but now also to curb emerging ART resistance. 20s proteasome inhibitors have been shown  
418 to enhance ART action in both ART sensitive and resistant lines.<sup>17-18</sup> Our data in this study also show  
419 that upstream targeting of the UPS by some but by no means all DUB inhibitors can potentiate and  
420 enhance ART action in certain cases to a similar extent as 20s proteasome inhibitors. ARTs act by  
421 targeting several (possibly random) parasite proteins upon activation<sup>8-9</sup> which necessitates, among  
422 other things, an upregulated UPS mediated stress response which rapidly recycles and clears  
423 damaged proteins henceforth promoting survival in ART resistant parasites.<sup>6, 13, 17</sup> As with 20s  
424 proteasome inhibitors,<sup>17-18</sup> inhibition of parasite UPS by targeting single or multiple DUBs  
425 simultaneously potentiates ART or DHA action. Inhibition of parasite UPS by b-AP15, for example,  
426 would prevent the normal protein homeostasis flux through the UPS, boosting the activity of  
427 pleiotropic ARTs by blocking the parasite stress and recovery system. Indeed, despite DHA being only  
428 additive in our isobole study with b-AP15, sublethal concentrations of b-AP15 can boost DHA activity

429 up to 15-fold. This boost is further enhanced when 2-3 DUB inhibitors at sub-lethal concentrations  
430 are combined as they improve DHA activity more than either inhibitors alone. This suggests that  
431 carefully titrated use of current DUB inhibitors in isolation, or simultaneously in mixtures may be a  
432 means to overcome ART resistance and the rodent model deployed here could be useful tool to  
433 optimise drug dosages. Indeed, recent findings have shown that accumulation of polyubiquitinated  
434 proteins in malaria parasites either by DUB or 20s proteasome inhibition is critical in activating the  
435 stress responses and contributes to DHA lethality in malaria parasites.<sup>13</sup> The observed increase in  
436 ART efficacy when combined with DUB inhibitors which is of a similar level to that achieved by  
437 inhibition of the proteasome by epoxomicin *in vitro* and Carfilzomib *in vivo*<sup>17</sup> further alludes to the  
438 potential of DUB inhibitors for achieving similar attributes in malaria parasites.

439  
440 Indeed, whilst useful as independent potential antimalarial agents, DUB inhibitors show potential for  
441 partnership and this study demonstrated that different classes of DUBs can be targeted  
442 simultaneously to achieve better parasite killing while potentially minimising the resistance  
443 emergence window. More importantly, low and safe doses of b-AP15 with no effect on parasite  
444 growth alone significantly potentiated sub-curative dose of ART to almost curative levels *in vivo*  
445 providing a proof of concept that DUB inhibitors can enhance the activity of ARTs both *in vitro* and  
446 *in vivo* making them potential adjunct drugs to enhance ART action and tackle resistance. Similarly,  
447 other potential radical ways of overcoming resistance in malaria parasites would be combining  
448 drugs with different mode of actions in complex combinations or using multiple (different) first line  
449 combinational therapies at once to raise the probability barrier of developing resistance by  
450 simultaneously targeting several pathways.<sup>50</sup> Our data exemplify this concept, as for example when  
451 b-AP15 and epoxomicin are combined in a fixed ratio isobole analysis, their appears to be no  
452 interaction or possibly even an antagonistic effect. This observation would be symptomatic of an  
453 antagonistic suppression mechanism where the activity of two inhibitors in the same pathway  
454 upstream or downstream negatively feeds back to the activity of the other leading to counteractive  
455 effects. However, when b-AP15 and epoxomicin are mixed in equal concentration ratios and  
456 combined with DHA, their overall activity achieves a better efficacy with DHA than either of the  
457 inhibitors alone. The optimal simultaneous exposure of the parasite UPS to DUBs and 20s  
458 proteasome inhibitors could thus act as an additional opportunity to overcome resistance to ARTs if  
459 the parasites would acquire resistance mutations to either of the UPS inhibitors. This has indeed  
460 been recently illustrated where combined inhibition of the parasite  $\beta 2$  and  $\beta 5$  subunits of the  
461 parasites UPS has been shown to strongly synergize DHA activity.<sup>51</sup>

462

463 In conclusion, our work confirms DUBs as potential druggable candidates in malaria parasites. Drug  
464 discovery programs take a long time, with for example a minimum of five years required to take a  
465 lead compound to a clinical candidate in malaria.<sup>52-53</sup> The emergent resistance to ACTs, a paucity in  
466 the number of antimalarial drugs in the developmental pipeline and a lack of scalable pipelines for  
467 drug discovery in other human malaria parasites such as *P. vivax* and *P. ovale*,<sup>53</sup> all necessitates  
468 both radical as well as alternative approaches to identify new drugs and drug targets. As DUBs are  
469 already being actively explored as anticancer agents with candidate inhibitors already entering  
470 clinical trials,<sup>54</sup> antimalarial drug discovery programs could take advantage to structurally improve  
471 or re-purpose such entities not just as potential drug targets in malaria, but also as combinational  
472 partners to ARTs to overcome the spectre of resistance.

473

474

## 475 **Materials and methods**

### 476 **Parasite lines**

477 Experiments in PB were carried out in an 820 line that expresses green fluorescent protein (GFP) and  
478 red fluorescent protein (RFP) in male and female gametocytes respectively, and a 507 line that  
479 constitutively expresses GFP under the control of the Pbeef1 $\alpha$  promoter. Generation and  
480 characterisation of the 820 and 507 lines has been previously described.<sup>55-56</sup> Growth inhibitory  
481 experiments in PF were performed in the CQ and ART sensitive 3D7 line and the ART resistant  
482 Cambodian Kelch13 C580Y mutant line (a kind gift from D. Fidock).

483

### 484 **Drugs and inhibitors**

485 DHA (Selleckchem) was prepared at 1mM stock concentration in 100% DMSO and diluted to working  
486 concentration in complete (PF) or schizont media (PB). ART (Sigma) and Epoxomicin (Sigma) were  
487 dissolved in 100% DMSO to stock concentrations of 100  $\mu$ M and 90 $\mu$ M respectively and diluted in  
488 complete culture media or schizont culture media to their respective working concentrations. CQ  
489 diphosphate (Sigma) was dissolved to stock concentration of 10 mM in 1X phosphate buffered saline  
490 (PBS) and diluted to working concentration in complete or schizont culture media. Seven different  
491 classes of DUB inhibitors (Table 1) were screened and were all obtained from Focus Biomolecules  
492 except for 1, 10 phenanthroline which was obtained from BPS biosciences. Stocks of DUB inhibitors  
493 were prepared at 10 mM in 100% DMSO and diluted in complete or schizont media to working  
494 concentrations. Testing concentrations ranged from 2000-0.01nM for epoxomicin, DHA, ART and CQ  
495 and 100-0.002 $\mu$ M for DUB inhibitors. All DUB inhibitors were supplied at a purity grade of >97%  
496 (Supplementary Table 2) and further analysed for chemical integrity on a High-Performance Liquid

497 Chromatography (HPLC) platform (Supplementary Table 3, Supplementary Figure 5) as detailed  
498 below.

499

#### 500 **HPLC analysis of DUB inhibitors**

501 HPLC solvents were purchased from standard suppliers and used without additional purification.  
502 DUB inhibitors were analysed on a Shimadzu reverse-phase HPLC (RP-HPLC) system equipped with  
503 Shimadzu LC-20AT pumps, a SIL-20A auto sampler and a SPD-20A UV-vis detector (monitoring at 254  
504 nm) using a Phenomenex, Aeris, 5 µm, peptide XB-C18, 150 x 4.6 mm column at a flow rate of 1  
505 mL/min. RP-HPLC gradients were run using a solvent system consisting of solution A (H<sub>2</sub>O + 0.1%  
506 trifluoroacetic acid) and B (acetonitrile + 0.1% trifluoroacetic acid). Further gradient analyses were  
507 run from 0% to 100% using solution B over 20 minutes. Analytical RP-HPLC data was reported as  
508 column retention time in minutes. Percentage purity was quantified by percentage peak area in  
509 relation to main peak.

510

#### 511 **PB animal infections**

512 PB parasites were maintained in female Theiler's Original (TO) mice (Envigo) weighing between 25-  
513 30g. Parasite infections were established either by IP of ~200µl of cryopreserved parasite stocks or  
514 intravenous injections (IVs) of purified schizonts. For infections from a donor infected mouse  
515 (mechanical passage), 5-30µl of infected blood was diluted in phosphate buffered saline (PBS)  
516 followed by injections of 100-200µl by IP. Since PB preferentially invades reticulocytes,<sup>57</sup> mice were  
517 pre-treated with 100µl of phenylhydrazine at 12.5mg/ml in physiological saline 2 days before the  
518 infections to induce reticulocytosis for some experiments. Routine monitoring of parasitaemia in  
519 infected mice was done by monitoring methanol fixed thin blood smears stained in Giemsa (Sigma)  
520 or flow cytometry analysis of infected blood stained with Hoescht 33342 (Invitrogen). Blood from  
521 infected mice was collected by cardiac puncture under terminal anaesthesia. All animal work was  
522 approved by the University of Glasgow's Animal Welfare and Ethical Review Body and by the UK's  
523 Home Office (PPL 60/4443) and carried out by appropriately licenced individuals. The animal care  
524 and use protocol complied with the UK Animals (Scientific Procedures) Act 1986 as amended in 2012  
525 and with European Directive 2010/63/EU on the Protection of Animals Used for Scientific Purposes.

526

#### 527 **PB *in vitro* culture and drug susceptibility assays**

528 For *in vitro* maintenance of PB, cultures were maintained for one developmental cycle using a  
529 standardised schizont culture media containing RPMI1640 with 25mM hypoxanthine, 10mM sodium  
530 bicarbonate, 20 % fetal calf serum, 100U/ml Penicillin and 100µg/ml streptomycin. Culture flasks



531 were gassed for 30 seconds with a special gas mix of 5% CO<sub>2</sub>, 5% O<sub>2</sub>, 90% N<sub>2</sub> and incubated for 22-  
532 24 hours at 37°C with gentle shaking, conditions that allow for development of ring stage parasites  
533 to mature schizonts. Drug assays to determine *in vitro* growth inhibition during the intraerythrocytic  
534 stage were performed in these standard short-term cultures as previously described.<sup>29-30</sup> Briefly, 1  
535 ml of infected blood with a non-synchronous parasitaemia of 3-5% was collected from an infected  
536 mouse and cultured for 22-24 hours in 120 ml of schizont culture media. Schizonts were enriched  
537 from the cultures by Nycodenz density flotation as previously described<sup>58</sup> followed by immediate  
538 injection into a tail vein of a naive mouse. Upon IV injection of schizonts, they immediately rupture  
539 with resulting merozoites invading new red blood cells within minutes to obtain synchronous *in vivo*  
540 infection containing >90% rings and a parasitaemia of 1-2%. Blood was collected from the infected  
541 mice 2 hours post injection and mixed with serially diluted drugs in schizont culture media in 96 well  
542 plates at a final haematocrit of 0.5% in a 200µl well volume. Plates were gassed and incubated  
543 overnight at 37°C. After 22-24 hours of incubation, schizont maturation was analysed by flow  
544 cytometry after staining the infected cells with DNA dye Hoechst-33258. Schizonts were gated and  
545 quantified based on fluorescence intensity on a BD FACSCelesta or a BD LSR Fortessa (BD  
546 Biosciences, USA). To determine growth inhibitions and calculate IC<sub>50</sub>, quantified schizonts in no drug  
547 controls were set to correspond to 100% with subsequent growth percentages in presence of drugs  
548 calculated accordingly. Dose response curves were plotted in Graph-pad Prism.

549

#### 550 **PF culture and the SYBR Green I® assay for parasite growth inhibition**

551 PF 3D7 or C580Y lines were cultured and maintained at 1-5% parasitaemia in fresh group O-positive  
552 red blood cells re-suspended to a 5% haematocrit in custom reconstituted RPMI 1640 complete  
553 media (Thermo Scientific) containing 0.23% sodium bicarbonate, 0.4% D-glucose, 0.005%  
554 hypoxanthine 0.6% Hepes, 0.5% Albumax II, 0.03% L-glutamine and 25mg/L gentamicin. Culture  
555 flasks were gassed with a mixture of 1% O<sub>2</sub>, 5% CO<sub>2</sub>, and 94% N<sub>2</sub> and incubated at 37°C. Prior to the  
556 start of the experiments, asynchronous stock cultures containing mainly ring stages were  
557 synchronised with 5% sorbitol as previously described.<sup>59</sup> Parasitaemia was determined with drug  
558 assays performed when the parasitaemia was between 1.5-5% with >90% rings. The stock culture  
559 was diluted to a haematocrit of 4% and 0.3% parasitaemia in complete media following which 50µl  
560 was mixed with 50µl of serial diluted drugs/inhibitors in complete media pre-dispensed in black 96  
561 well optical culture plates (Thermo scientific) for a final haematocrit of 2%. Plates were gassed and  
562 incubated at 37°C for 72 hours followed by freezing at -20°C for at least 24 hours. The plate setup  
563 also included no drug controls as well as uninfected red cells at 2% haematocrit. After 72 hours of  
564 incubation and at least overnight freezing at -20°C, plates were thawed at room temperature for ~4

565 hours. This was followed by addition of 100µl to each well of 1X SYBR Green I® (Invitrogen) lysis  
566 buffer containing 20 mM Tris, 5 mM EDTA, 0.008% saponin and 0.08% Triton X-100. Plate contents  
567 were mixed thoroughly by shaking at 700 rpm for 5 minutes and incubated for 1 hour at room  
568 temperature in the dark. After incubation, plates were read to quantify SYBR Green I® fluorescence  
569 intensity in each well by a PHERAstar® FSX microplate reader (BMG Labtech) with excitation and  
570 emission wavelengths of 485 and 520nm respectively. To determine growth inhibition, background  
571 fluorescence intensity from uninfected red cells was subtracted first. Fluorescence intensity of no  
572 drug controls was then set to correspond to 100% and subsequent intensity in presence of  
573 drug/inhibitor was calculated accordingly. Dose response curves and IC<sub>50</sub> concentrations were  
574 plotted in Graph-pad Prism 7. Human blood was obtained and used within the ethical remit of the  
575 Scottish National Blood Transfusion Service.

576

### 577 ***In vitro* drug combinations**

578 Parasites were maintained and cultivated as described above. To determine drug interactions of  
579 DHA in combination with DUB or proteasome inhibitors, serial dilutions of DHA were mixed with  
580 fixed ratios of epoxomicin, b-AP15, PR-619 and WP1130 or their fractional combinations at their  
581 respective IC<sub>50</sub>s or half IC<sub>50</sub>s. The drug combinations were incubated with parasites from which  
582 parasite growth was quantified and dose response curves were plotted, for DHA alone or in  
583 combination with the fixed doses of the DUB or proteasome inhibitors. IC<sub>50</sub> values were obtained  
584 and the fold change or IC<sub>50</sub> shifts were plotted in Graph-pad Prism using the extra sum of squares F-  
585 test for statistical comparison. For drug interactions in fixed ratios, a modified fixed ratio interaction  
586 assay was employed as previously described.<sup>60</sup> Drug combinations were prepared in six distinct  
587 molar concentration combination ratios; 5:0, 4:1, 3:2, 2:3 1:4, 0:5 and dispensed in top wells of 96-  
588 well plates. This was followed by a 2 or 3-fold serial dilution with precisely pre-calculated estimates  
589 that made sure that the IC<sub>50</sub> of individual drugs falls to the middle of the plate. The drug  
590 combinations were then incubated with parasites from which parasite growth and dose response  
591 curves were calculated for each drug alone or in combination. Fractional inhibitory concentrations  
592 (FIC<sub>50</sub>) were obtained for drugs in combination and summed to obtain the  $\sum$ FIC<sub>50</sub> using the formula  
593 below:

594 
$$\sum FIC_{50} = (IC_{50} \text{ of drug A in combination} / IC_{50} \text{ of drug A alone}) + (IC_{50} \text{ of drug B in combination} / IC_{50}$$
  
595 of drug B alone).

596 An  $\sum FIC_{50}$  of >4 was used to denote antagonism,  $\sum FIC_{50} \leq 0.5$  synergism and  $\sum FIC_{50} = 0.5-4$  additivity.  
597 <sup>61</sup> FIC<sub>50</sub> for the drug combinations were plotted to obtain isobolograms for the drug combination  
598 ratios.

599 **PF viability assays**

600 The 3D7 line was synchronised with 5% sorbitol over three life cycles followed by Nycodenz  
601 enrichment of later schizonts. Enriched schizonts were incubated with fresh red blood cells in a  
602 shaking incubator for 3 hours followed by another round of sorbitol treatment to eliminate residual  
603 late stage parasites. Resultant ring cultures were diluted to around ~1% parasitaemia and incubated  
604 with predefined drug combinations for set time periods. Drugs were washed off 3 times after the set  
605 incubation times. Parasite viability was assessed 66 hours later in cycle 2 by flow cytometry analysis  
606 of parasite cultures stained with Syber Green I and MitoTracker Deep Red dyes (Invitrogen). Flow  
607 cytometry analysis was carried on a MACSQuant® Analyzer 10.

608

609 ***In vivo* anti-parasitic activity of DUB inhibitors**

610 To evaluate the activity of DUB inhibitors (b-AP15) *in vivo*, the Peters' 4 day suppressive test was  
611 initially employed as previously described.<sup>62</sup> Stock concentrations of b-AP15 were prepared at  
612 3mg/ml and 1mg/ml in a 1:1 mixture of DMSO and Tween® 80 (Sigma) followed by a 10-fold dilution  
613 to stock working concentrations (5% DMSO and Tween® 80 final) in sterile distilled water. CQ was  
614 prepared at 50mg/ml in 1X PBS and diluted to working stock in 1X PBS. A donor mouse was initially  
615 infected with PB 820 line from which blood was obtained when the parasitaemia was between 2-5%.  
616 Donor blood was diluted in rich PBS following which ~10<sup>5</sup> parasites were inoculated by IP into four  
617 mice groups (3 mice per group). 1-hour post infection, mice groups received drug doses by IP  
618 injection as follows: group 1 (vehicle; 5% DMSO & Tween® 80), group 2 (CQ; 20mg/kg), group 3 (b-  
619 AP15; 1mg/kg) and group 4 (5mg/kg) for 4 consecutive days. Parasitaemia was monitored daily by  
620 flow cytometry analysis of infected cells stained with Hoechst-33258 and microscopic analysis of  
621 methanol fixed Giemsa stained smears. To evaluate the potential synergy of b-AP15 and ART *in vivo*,  
622 a modified Rane's curative test in established infections was used.<sup>63</sup> Blood was obtained from a  
623 donor mouse at a parasitaemia of 2-3% and diluted in rich PBS. Seventeen mice were inoculated  
624 with ~10<sup>5</sup> parasites by IP on day 0 allowing the parasitaemia to rise to ~2-2.5%, typically on day 4.  
625 Following the establishment of infection, mice were divided into five groups and received drug  
626 doses as follows: group 1 (5mg/kg ART n=3), group 2 (10mg/kg ART, n=3), group 3 (20mg/kg ART  
627 n=3), group 4 (5mg/kg ART + 1mg/kg b-AP15, n=4), group 5 (10mg/kg ART + 1mg/kg b-AP15, n=4).  
628 ART and b-AP15 were prepared at 12.5mg/ml and 1mg/ml respectively in 1:1 mixture of DMSO and  
629 Tween® 80 and diluted 10-fold (final 5% DMSO and Tween® 80) to their respective working  
630 concentrations. Parasitaemia was monitored daily by flow cytometry and analysis of methanol fixed  
631 Giemsa stained smears.

632

633 **Acknowledgments**

634 We thank Mathias Matti for meaningful discussions; Steve Ward at Liverpool School of Tropical  
635 Medicine for suggestions and carefully reading the manuscript; Diane Vaughan and the iii-flow  
636 cytometry facility for technical assistance. We also thank Amit Mahindra and Andrew Jamieson at  
637 the University of Glasgow School of Chemistry for HPLC analysis of the DUB inhibitors. This work was  
638 supported by grants from the Wellcome Trust to A.P.W (083811/Z/07/Z; 107046/Z/15/Z). M.P.B. and  
639 APW are funded by a Wellcome Trust core grant to the Wellcome Centre for Integrative Parasitology  
640 (104111/Z/14/Z). N.V.S is a Commonwealth Doctoral Scholar (MWCS-2017-789), funded by the UK  
641 government.

642

643 **Author contributions**

644 N.V.S conceived the experiments, performed data curation, analysis, investigation, validation,  
645 visualisation and writing of original draft. K.R.H, M.T.R and M.P.B participated in formal data  
646 analysis, investigation, validation, review and editing. A.P.W conceived the study, experiments,  
647 analysis, investigation, validation, writing of original draft, review, editing and supervision.

648

649

650 **References**

651

652 1. WHO 2019. World Malaria Report; World Health organisation: Geneva, Switzerland.

653 2. WHO 2018. World Malaria Report; World Health organisation: Geneva, Switzerland.

654 3. Okell, L. C.; Drakeley, C. J.; Ghani, A. C.; Bousema, T.; Sutherland, C. J., Reduction of transmission  
655 from malaria patients by artemisinin combination therapies: a pooled analysis of six randomized  
656 trials. (2008) *Malar. J.* **7**, 125-125.

657 4. Cui, L.; Mharakurwa, S.; Ndiaye, D.; Rathod, P. K.; Rosenthal, P. J., Antimalarial Drug Resistance:  
658 Literature Review and Activities and Findings of the ICEMR Network. (2015) *Am. J. Trop. Med. Hyg.*  
659 **93** (3 Suppl), 57-68.

660 5. Dondorp, A. M.; Nosten, F.; Yi, P.; Das, D.; Phyo, A. P.; Tarning, J.; Lwin, K. M.; Arie, F.;  
661 Hanpithakpong, W.; Lee, S. J.; Ringwald, P.; Silamut, K.; Imwong, M.; Chotivanich, K.; Lim, P.;  
662 Herdman, T.; An, S. S.; Yeung, S.; Singhasivanon, P.; Day, N. P. J.; Lindergardh, N.; Socheat, D.; White,  
663 N. J., Artemisinin Resistance in *Plasmodium falciparum* Malaria. (2009) *N. Engl. J. Med.* **361** (5), 455-  
664 467.

665 6. Tilley, L.; Straimer, J.; Gnädig, N. F.; Ralph, S. A.; Fidock, D. A., Artemisinin action and resistance in  
666 *Plasmodium falciparum*. (2016) *Trends Parasitol.* **32** (9), 682-696.

667 7. Haldar, K.; Bhattacharjee, S.; Safeukui, I., Drug resistance in *Plasmodium*. (2018) *Nat. Rev.*  
668 *Microbiol.* **16** (3), 156-170.

- 669 8. Wang, J.; Zhang, C. J.; Chia, W. N.; Loh, C. C.; Li, Z.; Lee, Y. M.; He, Y.; Yuan, L. X.; Lim, T. K.; Liu, M.;  
670 Liew, C. X.; Lee, Y. Q.; Zhang, J.; Lu, N.; Lim, C. T.; Hua, Z. C.; Liu, B.; Shen, H. M.; Tan, K. S.; Lin, Q.,  
671 Haem-activated promiscuous targeting of artemisinin in *Plasmodium falciparum*. (2015) Nat.  
672 Commun. **6**, 10111.
- 673 9. Ismail, H. M.; Barton, V.; Phanchana, M.; Charoensutthivarakul, S.; Wong, M. H.; Hemingway, J.;  
674 Biagini, G. A.; O'Neill, P. M.; Ward, S. A., Artemisinin activity-based probes identify multiple  
675 molecular targets within the asexual stage of the malaria parasites *Plasmodium falciparum* 3D7.  
676 (2016) Proc. Natl. Acad. Sci. U. S. A. **113** (8), 2080-5.
- 677 10. Mbengue, A.; Bhattacharjee, S.; Pandharkar, T.; Liu, H.; Estiu, G.; Stahelin, R. V.; Rizk, S. S.;  
678 Njimoh, D. L.; Ryan, Y.; Chotivanich, K.; Nguon, C.; Ghorbal, M.; Lopez-Rubio, J. J.; Pfrender, M.;  
679 Emrich, S.; Mohandas, N.; Dondorp, A. M.; Wiest, O.; Haldar, K., A molecular mechanism of  
680 artemisinin resistance in *Plasmodium falciparum* malaria. (2015) Nature **520** (7549), 683-7.
- 681 11. Birnbaum, J.; Scharf, S.; Schmidt, S.; Jonscher, E.; Hoeijmakers, W. A. M.; Flemming, S.; Toenhake,  
682 C. G.; Schmitt, M.; Sabitzki, R.; Bergmann, B.; Fröhlke, U.; Mesén-Ramírez, P.; Blancke Soares, A.;  
683 Herrmann, H.; Bártfai, R.; Spielmann, T., A Kelch13-defined endocytosis pathway mediates  
684 artemisinin resistance in malaria parasites. (2020) Science **367** (6473), 51.
- 685 12. Yang, T.; Yeoh, L. M.; Tutor, M. V.; Dixon, M. W.; McMillan, P. J.; Xie, S. C.; Bridgford, J. L.; Gillett,  
686 D. L.; Duffy, M. F.; Ralph, S. A.; McConville, M. J.; Tilley, L.; Cobbold, S. A., Decreased K13 Abundance  
687 Reduces Hemoglobin Catabolism and Proteotoxic Stress, Underpinning Artemisinin Resistance.  
688 (2019) Cell Rep. **29** (9), 2917-2928.e5.
- 689 13. Bridgford, J. L.; Xie, S. C.; Cobbold, S. A.; Pasaje, C. F. A.; Herrmann, S.; Yang, T.; Gillett, D. L.; Dick,  
690 L. R.; Ralph, S. A.; Dogovski, C.; Spillman, N. J.; Tilley, L., Artemisinin kills malaria parasites by  
691 damaging proteins and inhibiting the proteasome. (2018) Nat. Commun. **9** (1), 3801.
- 692 14. Mok, S.; Ashley, E. A.; Ferreira, P. E.; Zhu, L.; Lin, Z.; Yeo, T.; Chotivanich, K.; Imwong, M.;  
693 Pukrittayakamee, S.; Dhorda, M.; Nguon, C.; Lim, P.; Amaratunga, C.; Suon, S.; Hien, T. T.; Htut, Y.;  
694 Faiz, M. A.; Onyamboko, M. A.; Mayxay, M.; Newton, P. N.; Tripura, R.; Woodrow, C. J.; Miotto, O.;  
695 Kwiatkowski, D. P.; Nosten, F.; Day, N. P.; Preiser, P. R.; White, N. J.; Dondorp, A. M.; Fairhurst, R. M.;  
696 Bozdech, Z., Drug resistance. Population transcriptomics of human malaria parasites reveals the  
697 mechanism of artemisinin resistance. (2015) Science **347** (6220), 431-5.
- 698 15. Siddiqui, F. A.; Boonhok, R.; Cabrera, M.; Mbenda, H. G. N.; Wang, M.; Min, H.; Liang, X.; Qin, J.;  
699 Zhu, X.; Miao, J.; Cao, Y.; Cui, L., Role of *Plasmodium falciparum* Kelch 13 Protein Mutations in P.  
700 falciparum Populations from Northeastern Myanmar in Mediating Artemisinin Resistance. (2020)  
701 mBio **11** (1), e01134-19.
- 702 16. Gnädig, N. F.; Stokes, B. H.; Edwards, R. L.; Kalantarov, G. F.; Heimsch, K. C.; Kuderjavy, M.; Crane,  
703 A.; Lee, M. C. S.; Straimer, J.; Becker, K.; Trakht, I. N.; Odom John, A. R.; Mok, S.; Fidock, D. A.,  
704 Insights into the intracellular localization, protein associations and artemisinin resistance properties  
705 of *Plasmodium falciparum* K13. (2020) PLoS Pathog. **16** (4), e1008482-e1008482.
- 706 17. Dogovski, C.; Xie, S. C.; Burgio, G.; Bridgford, J.; Mok, S.; McCaw, J. M.; Chotivanich, K.; Kenny, S.;  
707 Gnädig, N.; Straimer, J.; Bozdech, Z.; Fidock, D. A.; Simpson, J. A.; Dondorp, A. M.; Foote, S.; Klonis,  
708 N.; Tilley, L., Targeting the cell stress response of *Plasmodium falciparum* to overcome artemisinin  
709 resistance. (2015) PLoS Biol. **13** (4), e1002132.

- 710 18. Li, H.; O'Donoghue, A. J.; van der Linden, W. A.; Xie, S. C.; Yoo, E.; Foe, I. T.; Tilley, L.; Craik, C. S.;  
711 da Fonseca, P. C. A.; Bogyo, M., Structure- and function-based design of *Plasmodium*-selective  
712 proteasome inhibitors. (2016) *Nature* **530**, 233.
- 713 19. Henrici, R. C.; van Schalkwyk, D. A.; Sutherland, C. J., Modification of pfap2 $\mu$  and pfubp1  
714 Markedly Reduces Ring-Stage Susceptibility of *Plasmodium falciparum* to Artemisinin *In Vitro*. (2019)  
715 *Antimicrob. Agents Chemother.* **64** (1), e01542-19.
- 716 20. Simwela, N. V.; Hughes, K. R.; Roberts, A. B.; Rennie, M. T.; Barrett, M. P.; Waters, A. P.,  
717 Experimentally Engineered Mutations in a Ubiquitin Hydrolase, UBP-1, Modulate *In Vivo*  
718 Susceptibility to Artemisinin and Chloroquine in *Plasmodium berghei*. (2020) *Antimicrob. Agents*  
719 *Chemother.* **64** (7), e02484-19.
- 720 21. Hunt, P.; Afonso, A.; Creasey, A.; Culleton, R.; Sidhu, A. B.; Logan, J.; Valderramos, S. G.; McNae,  
721 I.; Cheesman, S.; do Rosario, V.; Carter, R.; Fidock, D. A.; Cravo, P., Gene encoding a deubiquitinating  
722 enzyme is mutated in artesunate- and chloroquine-resistant rodent malaria parasites. (2007) *Mol.*  
723 *Microbiol.* **65** (1), 27-40.
- 724 22. Soave, C. L.; Guerin, T.; Liu, J.; Dou, Q. P., Targeting the ubiquitin-proteasome system for cancer  
725 treatment: discovering novel inhibitors from nature and drug repurposing. (2017) *Cancer. Metastasi*  
726 *Rev.* **36** (4), 717-736.
- 727 23. Ng, C. L.; Fidock, D. A.; Bogyo, M., Protein Degradation Systems as Antimalarial Therapeutic  
728 Targets. (2017) *Trends Parasitol.* **33** (9), 731-743.
- 729 24. Lecker, S. H.; Goldberg, A. L.; Mitch, W. E., Protein degradation by the ubiquitin-proteasome  
730 pathway in normal and disease states. (2006) *J. Am. Soc. Nephrol.* **17** (7), 1807-19.
- 731 25. Hanpude, P.; Bhattacharya, S.; Dey, A. K.; Maiti, T. K., Deubiquitinating enzymes in cellular  
732 signaling and disease regulation. (2015) *IUBMB Life* **67** (7), 544-555.
- 733 26. Ponder, E. L.; Bogyo, M., Ubiquitin-Like Modifiers and Their Deconjugating Enzymes in Medically  
734 Important Parasitic Protozoa. (2007) *Eukaryotic Cell* **6** (11), 1943-1952.
- 735 27. Ponts, N.; Saraf, A.; Chung, D. W.; Harris, A.; Prudhomme, J.; Washburn, M. P.; Florens, L.; Le  
736 Roch, K. G., Unraveling the ubiquitome of the human malaria parasite. (2011) *J. Biol. Chem.* **286** (46),  
737 40320-30.
- 738 28. Aminake, M. N.; Arndt, H. D.; Pradel, G., The proteasome of malaria parasites: A multi-stage drug  
739 target for chemotherapeutic intervention? (2012) *Int. J. Parasitol. Drugs. Drug .Resist.* **2**, 1-10.
- 740 29. Franke-Fayard, B.; Djokovic, D.; Dooren, M. W.; Ramesar, J.; Waters, A. P.; Falade, M. O.;  
741 Kranendonk, M.; Martinelli, A.; Cravo, P.; Janse, C. J., Simple and sensitive antimalarial drug  
742 screening *in vitro* and *in vivo* using transgenic luciferase expressing *Plasmodium berghei* parasites.  
743 (2008) *Int. J. Parasitol.* **38** (14), 1651-62.
- 744 30. Janse, C. J.; Waters, A. P.; Kos, J.; Lugt, C. B., Comparison of *in vivo* and *in vitro* antimalarial  
745 activity of artemisinin, dihydroartemisinin and sodium artesunate in the *Plasmodium berghei*-rodent  
746 model. (1994) *Int. J. Parasitol.* **24** (4), 589-94.
- 747 31. Kreidenweiss, A.; Kremsner, P. G.; Mordmüller, B., Comprehensive study of proteasome  
748 inhibitors against *Plasmodium falciparum* laboratory strains and field isolates from Gabon. (2008)  
749 *Malar. J.* **7**, 187-187.

- 750 32. Bhattacharya, A.; Mishra, L. C.; Bhasin, V. K., *In vitro* activity of artemisinin in combination with  
751 clotrimazole or heat-treated amphotericin B against *Plasmodium falciparum*. (2008) Am. J. Trop.  
752 Med. Hyg. **78** (5), 721-8..
- 753 33. Chauhan, D.; Tian, Z.; Nicholson, B.; Kumar, K. G.; Zhou, B.; Carrasco, R.; McDermott, J. L.; Leach,  
754 C. A.; Fulciniti, M.; Kodrasov, M. P.; Weinstock, J.; Kingsbury, W. D.; Hideshima, T.; Shah, P. K.;  
755 Minvielle, S.; Altun, M.; Kessler, B. M.; Orlowski, R.; Richardson, P.; Munshi, N.; Anderson, K. C., A  
756 small molecule inhibitor of ubiquitin-specific protease-7 induces apoptosis in multiple myeloma cells  
757 and overcomes bortezomib resistance. (2012) Cancer Cell **22** (3), 345-58.
- 758 34. D'Arcy, P.; Brnjic, S.; Olofsson, M. H.; Fryknas, M.; Lindsten, K.; De Cesare, M.; Perego, P.;  
759 Sadeghi, B.; Hassan, M.; Larsson, R.; Linder, S., Inhibition of proteasome deubiquitinating activity as a  
760 new cancer therapy. (2011) Nat. Med. **17** (12), 1636-40.
- 761 35. Nicholson, B.; Leach, C. A.; Goldenberg, S. J.; Francis, D. M.; Kodrasov, M. P.; Tian, X.; Shanks, J.;  
762 Sterner, D. E.; Bernal, A.; Mattern, M. R.; Wilkinson, K. D.; Butt, T. R., Characterization of ubiquitin  
763 and ubiquitin-like-protein isopeptidase activities. (2008) Protein Sci. **17** (6), 1035-43.
- 764 36. Wang, L.; Delahunty, C.; Fritz-Wolf, K.; Rahlfs, S.; Helena Prieto, J.; Yates, J. R.; Becker, K.,  
765 Characterization of the 26S proteasome network in *Plasmodium falciparum*. (2015) Sci. Rep. **5**,  
766 17818.
- 767 37. Artavanis-Tsakonas, K.; Misaghi, S.; Comeaux, C. A.; Catic, A.; Spooner, E.; Duraisingh, M. T.;  
768 Ploegh, H. L., Identification by functional proteomics of a deubiquitinating/deNeddylating enzyme in  
769 *Plasmodium falciparum*. (2006) Mol. Microbiol. **61** (5), 1187-95.
- 770 38. Artavanis-Tsakonas, K.; Weihofen, W. A.; Antos, J. M.; Coleman, B. I.; Comeaux, C. A.; Duraisingh,  
771 M. T.; Gaudet, R.; Ploegh, H. L., Characterization and Structural Studies of the *Plasmodium*  
772 *falciparum* Ubiquitin and Nedd8 Hydrolase UCHL3. (2010) J. Biol. Chem. **285** (9), 6857-6866.
- 773 39. Zhang, M.; Wang, C.; Otto, T. D.; Oberstaller, J.; Liao, X.; Adapa, S. R.; Udenze, K.; Bronner, I. F.;  
774 Casandra, D.; Mayho, M.; Brown, J.; Li, S.; Swanson, J.; Rayner, J. C.; Jiang, R. H. Y.; Adams, J. H.,  
775 Uncovering the essential genes of the human malaria parasite *Plasmodium falciparum* by saturation  
776 mutagenesis. (2018) Science **360** (6388).
- 777 40. Bushell, E.; Gomes, A. R.; Sanderson, T.; Anar, B.; Girling, G.; Herd, C.; Metcalf, T.; Modrzynska,  
778 K.; Schwach, F.; Martin, R. E.; Mather, M. W.; McFadden, G. I.; Parts, L.; Rutledge, G. G.; Vaidya, A. B.;  
779 Wengelnik, K.; Rayner, J. C.; Billker, O., Functional Profiling of a *Plasmodium* Genome Reveals an  
780 Abundance of Essential Genes. (2017) Cell **170** (2), 260-272.e8.
- 781 41. Frickel, E. M.; Quesada, V.; Muething, L.; Gubbels, M. J.; Spooner, E.; Ploegh, H.; Artavanis-  
782 Tsakonas, K., Apicomplexan UCHL3 retains dual specificity for ubiquitin and Nedd8 throughout  
783 evolution. (2007) Cell. Microbiol. **9** (6), 1601-10.
- 784 42. Liu, Y.; Lashuel, H. A.; Choi, S.; Xing, X.; Case, A.; Ni, J.; Yeh, L. A.; Cuny, G. D.; Stein, R. L.;  
785 Lansbury, P. T., Jr., Discovery of inhibitors that elucidate the role of UCH-L1 activity in the H1299 lung  
786 cancer cell line. (2003) Chem. Biol. **10** (9), 837-46.
- 787 43. Lee, R. S.; Waters, A. P.; Brewer, J. M., A cryptic cycle in haematopoietic niches promotes  
788 initiation of malaria transmission and evasion of chemotherapy. (2018) Nat. Commun. **9** (1), 1689.
- 789 44. Yeh, P. J.; Hegreness, M. J.; Aiden, A. P.; Kishony, R., Drug interactions and the evolution of  
790 antibiotic resistance. (2009) Nat. Rev. Microbiol. **7** (6), 460-466.

- 791 45. Tyers, M.; Wright, G. D., Drug combinations: a strategy to extend the life of antibiotics in the 21st  
792 century. (2019) *Nat. Rev. Microbiol.* **17** (3), 141-155.
- 793 46. Fidock, D. A.; Rosenthal, P. J.; Croft, S. L.; Brun, R.; Nwaka, S., Antimalarial drug discovery:  
794 efficacy models for compound screening. (2004) *Nat. Rev. Drug Discov.* **3** (6), 509-520.
- 795 47. Janse, C. J.; Waters, A. P., *Plasmodium berghei*: The application of cultivation and purification  
796 techniques to molecular studies of malaria parasites. (1995) *Parasitol. Today* **11** (4), 138-143.
- 797 48. Davis, M. I.; Simeonov, A., Ubiquitin-Specific Proteases as Druggable Targets. (2015) *Drug. Targ.*  
798 *Rev.* **2** (3), 60-64.
- 799 49. Li, H.; Ponder, E. L.; Verdoes, M.; Asbjornsdottir, K. H.; Deu, E.; Edgington, L. E.; Lee, J. T.; Kirk, C.  
800 J.; Demo, S. D.; Williamson, K. C.; Bogyo, M., Validation of the proteasome as a therapeutic target in  
801 *Plasmodium* using an epoxyketone inhibitor with parasite-specific toxicity. (2012) *Chem. Biol.* **19**  
802 (12), 1535-1545.
- 803 50. Boni, M. F.; White, N. J.; Baird, J. K., The Community As the Patient in Malaria-Endemic Areas:  
804 Preempting Drug Resistance with Multiple First-Line Therapies. (2016) *PLoS Med.* **13** (3), e1001984-  
805 e1001984.
- 806 51. Kirkman, L. A.; Zhan, W.; Visone, J.; Dzieciech, A.; Singh, P. K.; Fan, H.; Tong, X.; Bruzual, I.; Hara,  
807 R.; Kawasaki, M.; Imaeda, T.; Okamoto, R.; Sato, K.; Michino, M.; Alvaro, E. F.; Guiang, L. F.; Sanz, L.;  
808 Mota, D. J.; Govindasamy, K.; Wang, R.; Ling, Y.; Tumwebaze, P. K.; Sukenick, G.; Shi, L.; Vendome, J.;  
809 Bhanot, P.; Rosenthal, P. J.; Aso, K.; Foley, M. A.; Cooper, R. A.; Kafsack, B.; Doggett, J. S.; Nathan, C.  
810 F.; Lin, G., Antimalarial proteasome inhibitor reveals collateral sensitivity from intersubunit  
811 interactions and fitness cost of resistance. (2018) *Proc. Natl. Acad. Sci. U. S. A.* **115** (29), E6863-  
812 E6870.
- 813 52. Lotharius, J.; Gamo-Benito, F. J.; Angulo-Barturen, I.; Clark, J.; Connelly, M.; Ferrer-Bazaga, S.;  
814 Parkinson, T.; Viswanath, P.; Bandodkar, B.; Rautela, N.; Bharath, S.; Duffy, S.; Avery, V. M.; Möhrle,  
815 J. J.; Guy, R. K.; Wells, T., Repositioning: the fast track to new anti-malarial medicines? (2014) *Malar.*  
816 *J.* **13**, 143-143.
- 817 53. Wells, T. N. C.; van Huijsduijnen, R. H.; Van Voorhis, W. C., Malaria medicines: a glass half full?  
818 (2015) *Nat. Rev. Drug. Discov.* **14** (6), 424-442.
- 819 54. Harrigan, J. A.; Jacq, X.; Martin, N. M.; Jackson, S. P., Deubiquitylating enzymes and drug  
820 discovery: emerging opportunities. (2017) *Nat. Rev. Drug. Discov.* **17**, 57.
- 821 55. Janse, C. J.; Franke-Fayard, B.; Mair, G. R.; Ramesar, J.; Thiel, C.; Engelmann, S.; Matuschewski, K.;  
822 Gemert, G. J. v.; Sauerwein, R. W.; Waters, A. P., High efficiency transfection of *Plasmodium berghei*  
823 facilitates novel selection procedures. (2006) *Mol. Biochem. Parasitol.* **145** (1), 60-70.  
824
- 825 56. Mair, G. R.; Lasonder, E.; Garver, L. S.; Franke-Fayard, B. M. D.; Carret, C. K.; Wiegant, J. C. A. G.;  
826 Dirks, R. W.; Dimopoulos, G.; Janse, C. J.; Waters, A. P., Universal Features of Post-Transcriptional  
827 Gene Regulation Are Critical for *Plasmodium* Zygote Development. (2010) *PLoS Pathog.* **6** (2),  
828 e1000767.
- 829 57. Cromer, D.; Evans, K. J.; Schofield, L.; Davenport, M. P., Preferential invasion of reticulocytes  
830 during late-stage *Plasmodium berghei* infection accounts for reduced circulating reticulocyte levels.  
831 (2006) *Int. J. Parasitol.* **36** (13), 1389-1397.



- 832 58. Philip, N.; Orr, R.; Waters, A. P., Transfection of rodent malaria parasites. (2013) *Methods Mol.*  
833 *Biol.* **923**, 99-125.
- 834 59. Lambros, C.; Vanderberg, J. P., Synchronization of *Plasmodium falciparum* erythrocytic stages in  
835 culture. (1979) *J. Parasitol.* **65** (3), 418-20.
- 836 60. Fivelman, Q. L.; Adagu, I. S.; Warhurst, D. C., Modified fixed-ratio isobologram method for  
837 studying in vitro interactions between atovaquone and proguanil or dihydroartemisinin against drug-  
838 resistant strains of *Plasmodium falciparum*. (2004) *Antimicrob. Agents Chemother.* **48** (11), 4097-  
839 102.
- 840 61. Odds, F. C., Synergy, antagonism, and what the chequerboard puts between them. (2003) *J.*  
841 *Antimicrob. Chemother.* **52** (1), 1-1.
- 842 62. Vega-Rodríguez, J.; Pastrana-Mena, R.; Crespo-Lladó, K. N.; Ortiz, J. G.; Ferrer-Rodríguez, I.;  
843 Serrano, A. E., Implications of Glutathione Levels in the *Plasmodium berghei* Response to  
844 Chloroquine and Artemisinin. (2015) *PLoS ONE* **10** (5), e0128212.
- 845 63. Boampong, J. N.; Ameyaw, E. O.; Aboagye, B.; Asare, K.; Kyei, S.; Donfack, J. H.; Woode, E., The  
846 Curative and Prophylactic Effects of Xylopic Acid on *Plasmodium berghei* Infection in Mice. (2013) *J.*  
847 *Parasitol. Res.* **2013**, 356107.
- 848 64. Altun, M.; Kramer, H. B.; Willems, L. I.; McDermott, J. L.; Leach, C. A.; Goldenberg, S. J.; Kumar, K.  
849 G.; Konietzny, R.; Fischer, R.; Kogan, E.; Mackeen, M. M.; McGouran, J.; Khoronenkova, S. V.;  
850 Parsons, J. L.; Dianov, G. L.; Nicholson, B.; Kessler, B. M., Activity-based chemical proteomics  
851 accelerates inhibitor development for deubiquitylating enzymes. (2011) *Chem. Biol.* **18** (11), 1401-  
852 12.
- 853 65. Kapuria, V.; Peterson, L. F.; Fang, D.; Bornmann, W. G.; Talpaz, M.; Donato, N. J., Deubiquitinase  
854 inhibition by small-molecule WP1130 triggers aggresome formation and tumor cell apoptosis. (2010)  
855 *Cancer Res.* **70** (22), 9265-76.
- 856 66. Cooper, E. M.; Cutcliffe, C.; Kristiansen, T. Z.; Pandey, A.; Pickart, C. M.; Cohen, R. E., K63-specific  
857 deubiquitination by two JAMM/MPN+ complexes: BRISC-associated Brcc36 and proteasomal Poh1.  
858 (2009) *EMBO J.* **28** (6), 621-31.
- 859  
860  
861  
862  
863  
864  
865  
866  
867  
868  
869

870 **Table and figure legends**

871 **Table 1: *In vitro* activity of DUB inhibitors in rodent and human malaria parasites.** IC<sub>50</sub> values and  
872 error bars are means and standard deviations from at least 3 independent repeats.

873

874 **Figure 1: *In vitro* interaction of different classes of DUB inhibitors in malaria parasites.** Isobologram  
875 interaction plots and  $\Sigma$ FIC<sub>50</sub> values of interactions between DUB inhibitors in the PF 3D7 line. **A.**  
876 Interaction between b-AP15 and WP1130 and their raw  $\Sigma$ FIC<sub>50</sub> values. **B.** Interaction between b-AP15  
877 and PR-619 and their raw  $\Sigma$ FIC<sub>50</sub> values.  $\Sigma$ FIC<sub>50</sub> values, plotted FIC<sub>50</sub>s and error bars are means and  
878 standard deviations from three biological repeats.

879

880 **Figure 2: *In vitro* potentiation of DHA by DUB inhibitors.** **A, B.** Dose response profiles and IC<sub>50</sub> values  
881 of DHA in the presence of b-AP15 at IC<sub>50</sub> equivalent concentration (DHA  $\delta$ ) in the PB 820 line (**A**) and  
882 3D7 line (**B**). **C.** Dose response profiles and IC<sub>50</sub> values of DHA in the presence of WP1130 and PR-619  
883 at their respective half IC<sub>50</sub>s (DHA  $\alpha+\beta$ ) in the 3D7 line. **D, E.** Dose response profiles and IC<sub>50</sub> values of  
884 DHA in combination with b-AP15, WP1130 and PR-619 at half IC<sub>50</sub> (DHA  $\alpha+\beta+\gamma$ ) in the 3D7 (**D**) and  
885 820 line (**E**). **F** Dose response profiles and IC<sub>50</sub> values of DHA combined with b-AP15 and WP1130 at  
886 IC<sub>50</sub> (DHA  $\delta$ , DHA  $\epsilon$ ) or b-AP15, WP1130 and PR-619 at half IC<sub>50</sub> (DHA  $\alpha+\beta+\gamma$ ) in ART resistant Kelch13  
887 C580Y mutant line. Dose response curves were plotted in Graph pad prism 7. Error bars are standard  
888 deviations from 3 independent biological repeats. Isobologram plots of DHA in combination with b-  
889 AP15 and WP1130 at 3:2 (**G**), 1:4 (**H**) and 2:3 (**I**) ratios and their raw  $\Sigma$ FIC<sub>50</sub> values.  $\Sigma$ FIC<sub>50</sub> values,  
890 plotted FIC<sub>50</sub>s and error bars are means and standard deviations from three biological repeats.

891

892 **Figure 3: A combination of DUB and 20s proteasome inhibitor improves synergy with DHA.** **A-C.**  
893 Isobologram interaction between epoxomicin and DHA (**A**), b-AP15 and epoxomicin (**B**) and a  
894 mixture of b-AP15 and epoxomicin at 1:1 molar concentration ratio in combination with DHA (**C**).  
895  $\Sigma$ FIC<sub>50</sub> values, plotted FIC<sub>50</sub>s and error bars are means and standard deviations from three biological  
896 repeats. **D.** Illustrated figure of the UPS indicating positional scope of USP14 and 20s units of the UPS  
897 and the inhibitor targets.

898

899 **Figure 4: pre-exposure of malaria parasites to UPS inhibitors alone or in combination enhances**  
900 **DHA action.** **A** pre-treatment of the PB 507 line (1.5 hours old rings) with b-AP15 at IC<sub>50</sub> (1.5 $\mu$ M) for  
901 3 hours followed by a wash and then DHA for another 3 hours. Median GFP intensity quantified by  
902 flow cytometry at 6 hours, 18hours and 24 hours. b-AP15 at IC<sub>50</sub> readded after DHA wash off in one  
903 experimental condition (green plot) while b-AP15 alone used as an additional control. Results are

904 representative of three independent experiments. **B.** DHA dose response viability plots and lethal  
905 dose (LD<sub>50</sub>) comparisons at 66 hours after pre-exposure of 0-3 hours old rings of the 3D7 line to  
906 DMSO (0.1%) or b-AP15 at half IC<sub>50</sub> (0.75µM), IC<sub>50</sub> (1.5µM) or 4X IC<sub>50</sub> (6µM) followed by DHA for 4  
907 hours. **C, D.** DHA dose response viability plots and lethal dose (LD<sub>50</sub>) comparisons at 66 hours after  
908 pre-exposure of 0-3 hours old rings of the 3D7 line (**C**) and ART resistant Kelch-13 C580Y line (**D**) to  
909 DMSO (0.1%) or epoxomicin at 0.2x IC<sub>50</sub> (2nM), IC<sub>50</sub> (12nM) or a combination of b-AP15 and  
910 epoxomicin at half IC<sub>50</sub> followed by DHA for 4 hours. Data from three independent experimental  
911 repeats. Significant differences between the conditions were calculated using one-way ANOVA  
912 alongside the Dunnet's multiple comparison test. Significance is indicated with asterisks;  
913 \*\*\*\*p < 0.0001.

914  
915 **Figure 5: *In vivo* activity of b-AP15 alone and or in combination with ART.** **A** Mice (4 groups of 3  
916 mice each) were infected with 10<sup>5</sup> parasites on day 1 and treated with indicated drug doses ~1 hour  
917 post infection for four consecutive days (indicated by arrows). Parasitaemia was monitored daily by  
918 flow cytometry and analysis of Giemsa stained smears. **B, C.** Percentage suppressions on day 4 (**B**)  
919 and bar of parasitaemias on day 4 and day 5 (**C**). **D, E.** Combination of ART and b-AP15 in established  
920 mouse infections. ART at 5mg/kg (**D**) or 10mg/kg (**E**) combined with b-AP15 (1mg/kg) administered  
921 in established mice infections at a parasitaemia of 2-2.5% for three consecutive days (indicated by  
922 arrows). Parasitaemia was monitored daily. ART at 20mg/kg was used as a curative control.  
923 Significant differences were calculated using one-way ANOVA alongside the Dunnet's multiple  
924 comparison test. Significance is indicated with asterisks; \*p < 0.05, \*\*p < 0.01, \*\*\*p < 0.001,  
925 \*\*\*\*p < 0.0001.

926  
927  
928  
929  
930  
931  
932  
933  
934  
935  
936  
937

938 **List of tables and figures**

939 **Table 1**

940

| Inhibitor           | Predicted UPS target                                 | IC <sub>50</sub> |              |
|---------------------|------------------------------------------------------|------------------|--------------|
|                     |                                                      | PB 820           | PF 3D7       |
| Artemisinin         | -                                                    | 17.23±0.4nM      | 6.50±0.4nM   |
| Dihydroartemisinin  | -                                                    | 13.89±0.1nM      | 6.23±0.34nM  |
| Epoxomicin          | 20s proteasome                                       | 14.20±3.0nM      | 11.12±0.23nM |
| PR-619              | broad spectrum DUB inhibitor <sup>a</sup>            | 3.30±2.0μM       | 2.41±0.5μM   |
| P5091               | USP7 and USP47 DUBs <sup>b</sup>                     | 8.38±2.10μM      | Not done     |
| TCID                | UCH-L3 and UCH-L1 DUBs <sup>c</sup>                  | >100μM           | >100μM       |
| WP1130              | UCH-L1, USP9X, USP14, UCH37 DUBs <sup>d</sup>        | 1.19±1.0μM       | 2.92±0.1μM   |
| b-AP15              | USP14 and UCH-L5 DUBs <sup>e</sup>                   | 1.06±0.9μM       | 1.55±0.1μM   |
| NSC-632839          | USP2, USP7, SENP2 DUBs <sup>f</sup>                  | 27.97±0.8μM      | Not done     |
| 1,10 phenanthroline | Metalloproteases and JAMM isopeptidases <sup>g</sup> | 0.63±0.3μM       | Not done     |

941

942 a, <sup>64</sup> b, <sup>33</sup> c, <sup>42</sup> d, <sup>65</sup> e, <sup>34</sup> f, <sup>35</sup> g. <sup>66</sup>

943

944

945

946

947

948 **Figure 1**

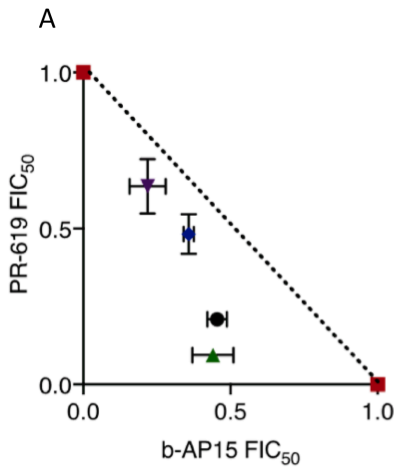

| Drug Combination Ratio  | $\Sigma FIC_{50}$ |
|-------------------------|-------------------|
| b-AP15 100%             | 1                 |
| b-AP15 80% : PR-619 20% | 0.623             |
| b-AP15 60% : PR-619 40% | 0.712             |
| b-AP15 40% : PR-619 60% | 0.731             |
| b-AP15 20% : PR-619 80% | 0.896             |
| PR-619 100%             | 1                 |

949

950

951

952

953

954

955

956

957

958

959

960

961

962

963

964

965

966

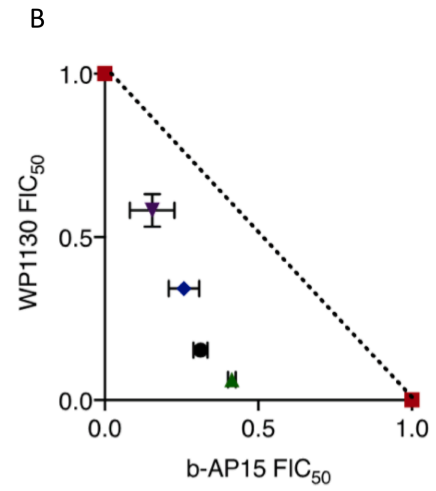

| Drug Combination Ratio  | $\Sigma FIC_{50}$ |
|-------------------------|-------------------|
| b-AP15 100%             | 1                 |
| b-AP15 80% : WP1130 20% | 0.478             |
| b-AP15 60% : WP1130 40% | 0.472             |
| b-AP15 40% : WP1130 60% | 0.656             |
| b-AP15 20% : WP1130 80% | 0.870             |
| WP1130 100%             | 1                 |

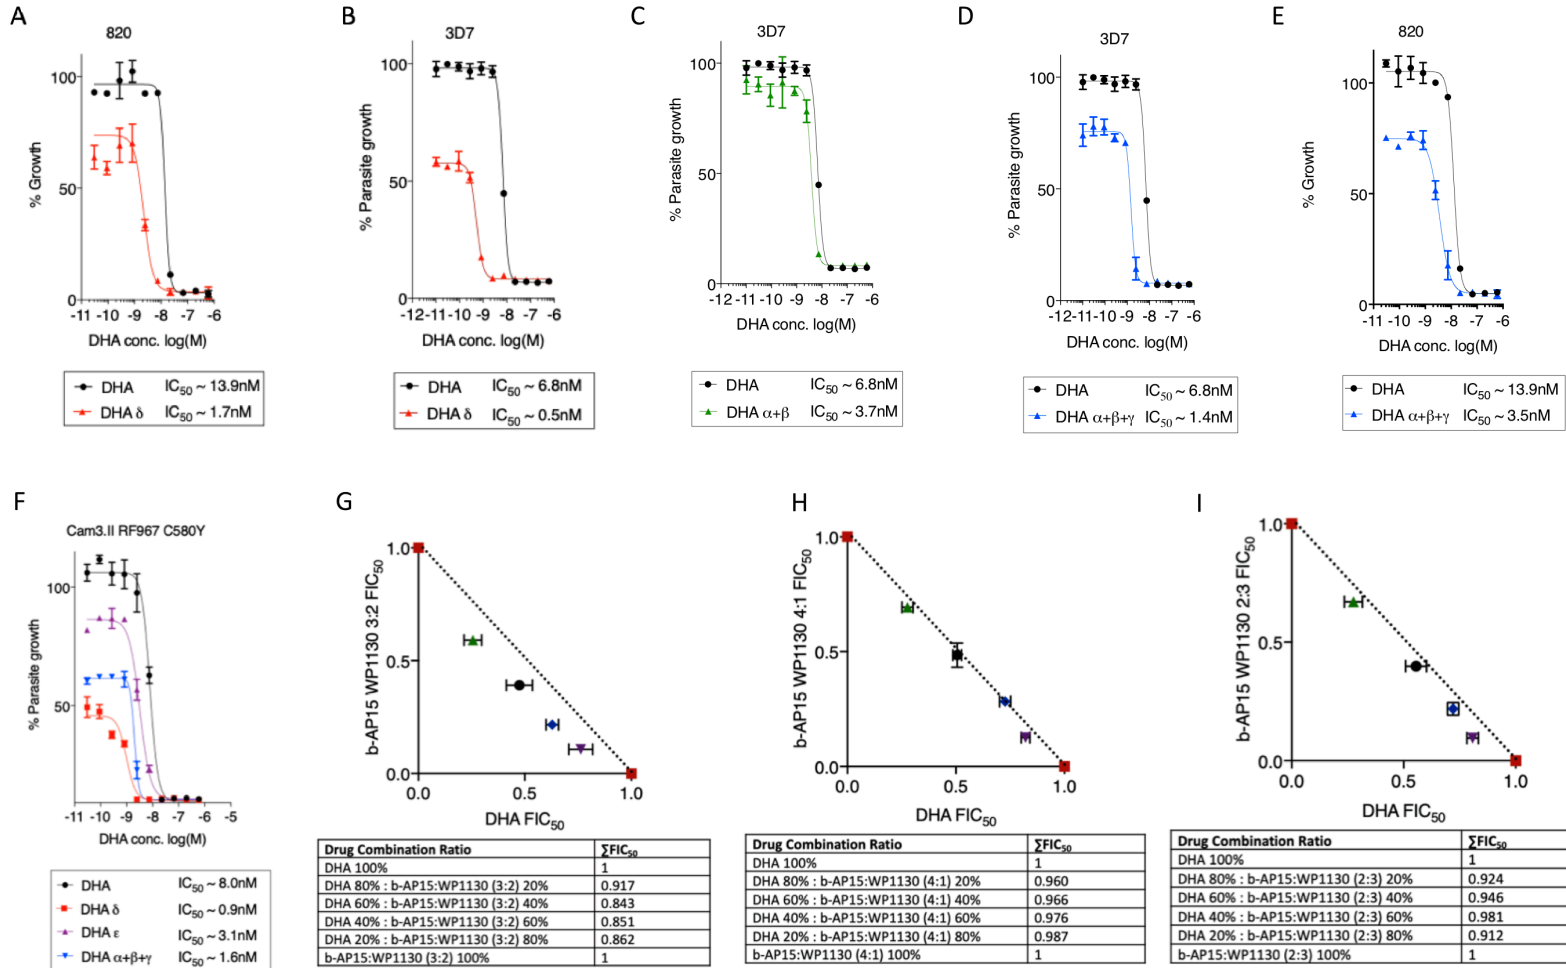

969 **Figure 3**

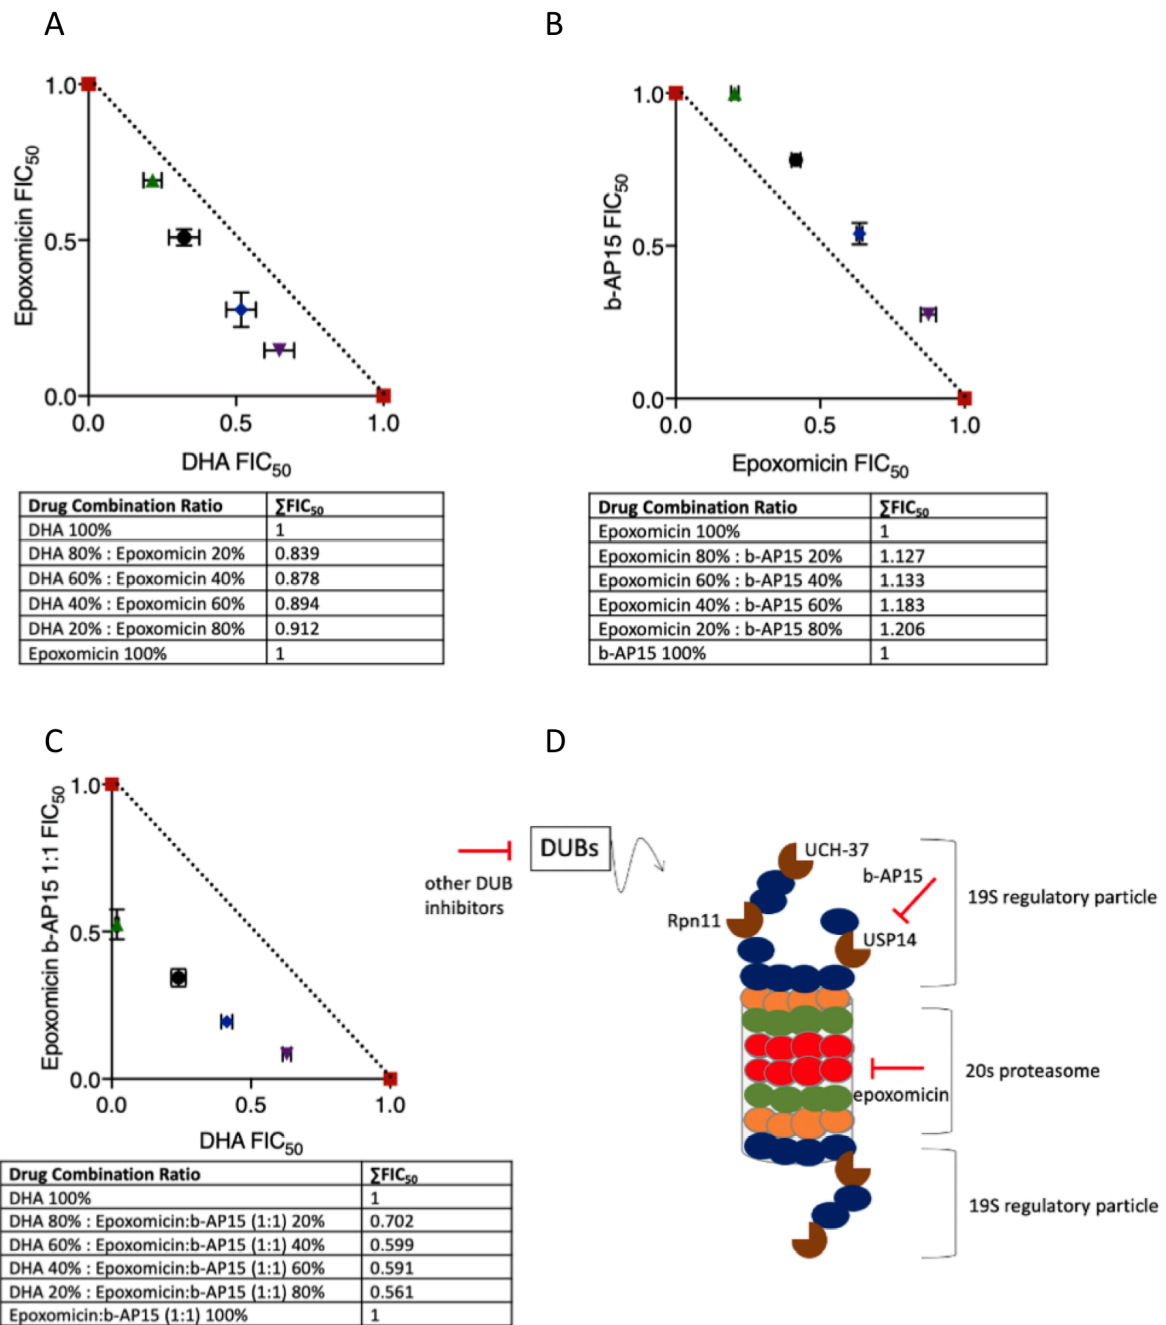

970

971

972

973

974

975

976

977

978 **Figure 4**

A

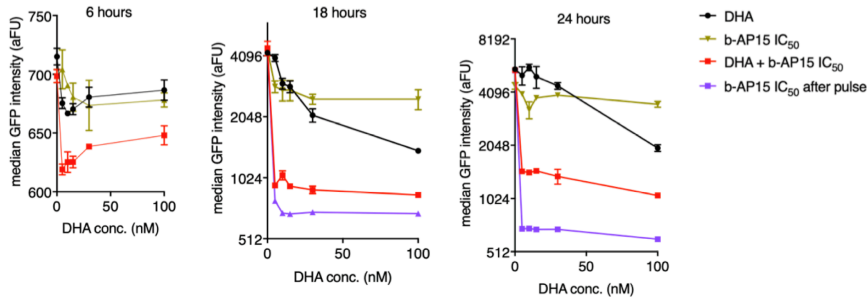

B

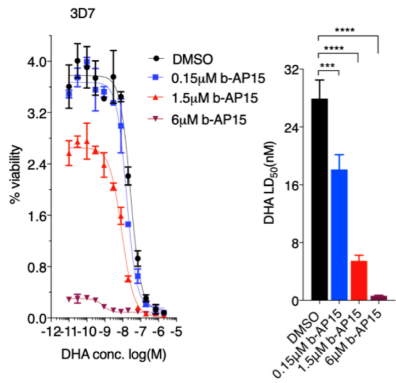

C

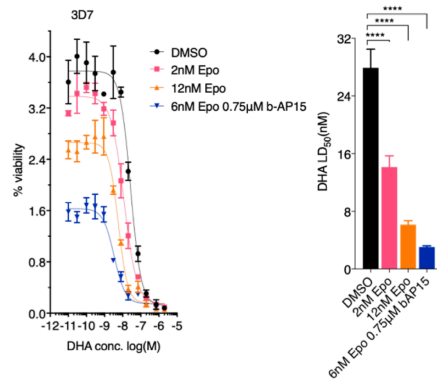

D

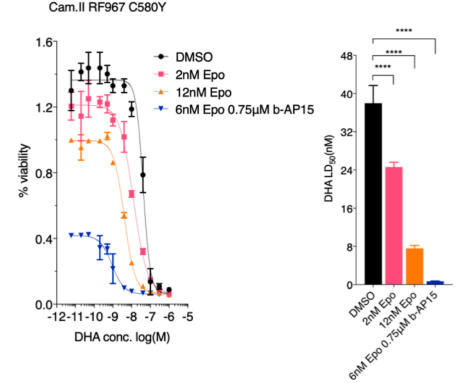

979

980

981

982

983

984

985

986

987

988

989

990

991

992

993

994

995

996

997



998

999 **Figure 5**

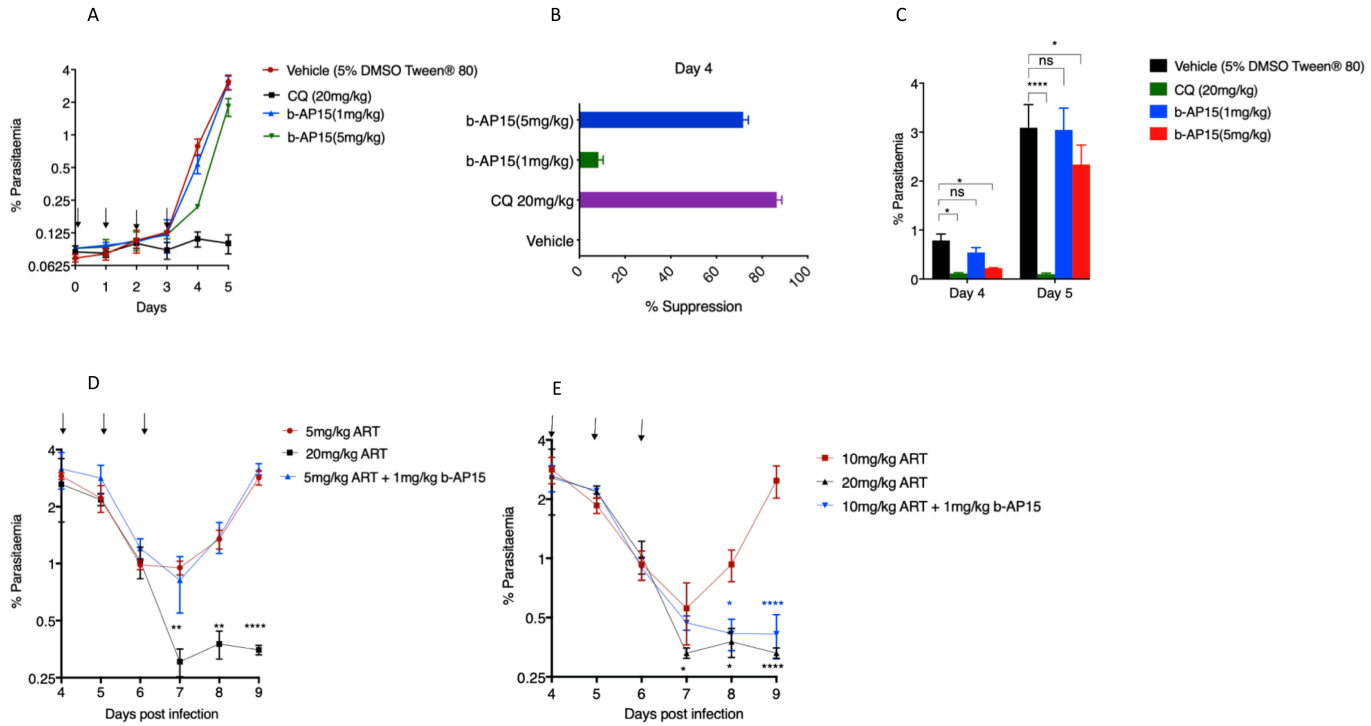

1000

1001

1002

1003

1004

1005

1006

1007

1008

1009

1010

1011

1012

1013

1014

1015

1016

1017
